# Supplementary material for: Circadian regulation of vertebrate cone photoreceptor function
Source: eLife journal article supplement (doi:10.7554/elife.68903), 2021-09-22
Supplement: supp [file elife-68903-supp-v1.zip]

Archive with 20 entries (20 files):
- elife_poa_e68903_Transparent_Reporting_File.docx
- elife_poa_e68903_Supplementary_file_1.txt
- elife_poa_e68903_Supplementary_file_2.txt
- elife_poa_e68903_Supplementary_file_3.txt
- elife_poa_e68903_Supplementary_file_4.txt
- elife_poa_e68903_Figure_1_source_data_1.xlsx
- elife_poa_e68903_Figure_2_source_data_1.xlsx
- elife_poa_e68903_Figure_3_source_data_1.xlsx
- elife_poa_e68903_Figure_4_source_data_1.xlsx
- elife_poa_e68903_Figure_5_source_data_1.zip
- elife_poa_e68903_Figure_6_source_data_1.xlsx
- elife_poa_e68903_Figure_7_source_data_1.zip
- elife_poa_e68903_Figure_1_figure_supplement_1.pdf
- elife_poa_e68903_Figure_1_figure_supplement_2.pdf
- elife_poa_e68903_Figure_1_figure_supplement_3.pdf
- elife_poa_e68903_Figure_1_figure_supplement_4.pdf
- elife_poa_e68903_Figure_4_figure_supplement_1.pdf
- elife_poa_e68903_Figure_4_figure_supplement_2.pdf
- elife_poa_e68903_Figure_7_figure_supplement_1.pdf
- elife_poa_e68903_Figure_7_figure_supplement_2.pdf
