# Supplementary material for: Circadian regulation of vertebrate cone photoreceptor function
Source: eLife journal article supplement (doi:10.7554/elife.68903), 2021-09-22
Supplement: supp [file elife-68903-supp-v1.zip › elife_poa_e68903_Figure_1_source_data_1.xlsx]

## Sheet: rcv1aLD
LD rcv1a 20130416	Quantity	Norm Factor	Expr Level	Fold Change		LD rcv1a 2013 0515	Quantity	Norm Factor	Expr Level	Fold Change		LD rcv1a 2013 0821	Quantity	Norm Factor	Expr Level	Fold Change		LD rcv1a 2013 1016	Quantity	Norm Factor	Expr Level	Fold Change		LD rcv1a 2013 1205	Quantity	Norm Factor	Expr Level	Fold Change			LD rcv1a 2013 1031	Quantity	Norm Factor	Expr Level	Fold Change					LD rcv1a 2013 1212	Quantity	Norm Factor	Expr Level	Fold Change				9	0.870301
9	0.872701	0.898536	0.971248	0.870301		9	0.265532	0.199372	1.33184	0.677299		9	0.221004	0.323295	0.6836	0.541828		9	0.751395	0.81159	0.925831	0.578519		9	0.349956	0.298984	1.17048	1			9	0.642423	0.455702	1.40974	1					9	0.595558	0.4974	1.19734	0.6019					0.997249
	1	0.898536	1.11292	0.997249			0.256484	0.199372	1.28646	0.654219			0.211171	0.323295	0.653184	0.51772			0.731392	0.81159	0.901185	0.563119			0.324453	0.298984	1.08518	0.927125				0.609219	0.455702	1.33688	0.948315						0.58088	0.4974	1.16783	0.587065					0.858272
	0.860639	0.898536	0.957824	0.858272			0.253016	0.199372	1.26906	0.645372			0.190067	0.323295	0.587906	0.46598			0.691645	0.81159	0.85221	0.532516			0.327297	0.298984	1.0947	0.935253				0.586226	0.455702	1.28642	0.912524						0.538405	0.4974	1.08244	0.544138
															#DIV/0!	#DIV/0!					#DIV/0!	#DIV/0!					#DIV/0!	#DIV/0!						#DIV/0!	#DIV/0!								#DIV/0!	#DIV/0!
12	0.260451	0.446284	0.583599	0.522942		12	0.542342	0.794253	0.682833	0.34725		12	0.512263	0.410992	1.2464	0.987912		12	0.453851	0.759806	0.597324	0.373247		12	0.457993	0.660756	0.693135	0.592178			12	0.337574	0.243328	1.38732	0.984094					12	0.620468	0.541254	1.14635	0.576268
	0.27884	0.446284	0.624803	0.559864			0.543428	0.794253	0.6842	0.347945			0.517467	0.410992	1.25907	0.997949			0.469992	0.759806	0.618569	0.386522			0.465741	0.660756	0.704861	0.602197				0.331244	0.243328	1.3613	0.965641						0.60139	0.541254	1.11111	0.558549				12	0.522942
	0.268004	0.446284	0.600525	0.538109			0.511782	0.794253	0.644356	0.327683			0.464488	0.410992	1.13016	0.895777			0.427605	0.759806	0.562782	0.351663			0.424569	0.660756	0.642551	0.548962				0.296298	0.243328	1.21769	0.863765						0.547677	0.541254	1.01187	0.508663					0.559864
															#DIV/0!	#DIV/0!					#DIV/0!	#DIV/0!					#DIV/0!	#DIV/0!						#DIV/0!	#DIV/0!								#DIV/0!	#DIV/0!					0.538109
15	0.392993	0.554712	0.708463	0.634829		15	0.969833	0.671671	1.44391	0.73429		15	0.231254	0.497209	0.465104	0.368646		15	0.19798	0.222299	0.890604	0.556508		15	0.686026	0.7358	0.932353	0.796554			15	0.478958	0.440696	1.08682	0.770935					15	0.0304577	0.015311	1.98927	1
	0.434099	0.554712	0.782566	0.70123			1	0.671671	1.48882	0.757131			0.250421	0.497209	0.503654	0.399201			0.199301	0.222299	0.896547	0.560221			0.653211	0.7358	0.887756	0.758453				0.464688	0.440696	1.05444	0.747967						0.0282093	0.015311	1.84242	0.92618
	0.392031	0.554712	0.706729	0.633274			0.875053	0.671671	1.3028	0.662529			0.230119	0.497209	0.462822	0.366837			0.190648	0.222299	0.857621	0.535898			0.621289	0.7358	0.844372	0.721388				0.448386	0.440696	1.01745	0.721726						0.0257971	0.015311	1.68487	0.846981
									#DIV/0!	#DIV/0!					#DIV/0!	#DIV/0!					#DIV/0!	#DIV/0!					#DIV/0!	#DIV/0!						#DIV/0!	#DIV/0!								#DIV/0!	#DIV/0!				15	0.634829
18	0.31829	0.431119	0.738288	0.661553		18	0.75176	0.722032	1.04117	0.529481		18	0.556209	0.942817	0.589944	0.467595		18	0.629904	0.764442	0.824005	0.514892		18	0.76069	0.678557	1.12104	0.957759			18	1	0.9169	1.09063	0.773639					18	1	0.858561	1.16474	0.585511					0.70123
	0.353429	0.431119	0.819795	0.734588			0.770231	0.722032	1.06676	0.542491			0.601459	0.942817	0.637938	0.505636			0.644527	0.764442	0.843134	0.526845			0.736432	0.678557	1.08529	0.927216				0.925392	0.9169	1.00926	0.715919						0.957655	0.858561	1.11542	0.560718					0.633274
	0.335602	0.431119	0.778443	0.697535			0.732813	0.722032	1.01493	0.516136			0.55212	0.942817	0.585607	0.464158			0.627024	0.764442	0.820238	0.512538			0.689054	0.678557	1.01547	0.867565				0.913619	0.9169	0.996421	0.706811						0.901967	0.858561	1.05056	0.528112
									#DIV/0!	#DIV/0!					#DIV/0!	#DIV/0!					#DIV/0!	#DIV/0!					#DIV/0!	#DIV/0!						#DIV/0!	#DIV/0!								#DIV/0!	#DIV/0!
21	0.394461	0.370762	1.06392	0.95334		21	0.279799	0.225173	1.2426	0.631913		21	0.941814	0.838242	1.12356	0.890543		21	0.340599	0.361603	0.941915	0.58857		21	1	0.911038	1.09765	0.937775			21	0.653336	0.492699	1.32604	0.940623					21	0.77899	0.755291	1.03138	0.518471				18	0.661553
	0.412438	0.370762	1.11241	0.996787			0.290569	0.225173	1.29043	0.656238			1	0.838242	1.19297	0.945562			0.330474	0.361603	0.913914	0.571073			0.974576	0.911038	1.06974	0.913933				0.650483	0.492699	1.32025	0.936516						0.772048	0.755291	1.02219	0.51385					0.734588
	0.397635	0.370762	1.07248	0.961011			0.25516	0.225173	1.13317	0.576268			0.857679	0.838242	1.02319	0.810988			0.320594	0.361603	0.886592	0.554001			0.915826	0.911038	1.00526	0.858839				0.603286	0.492699	1.22445	0.868565						0.700399	0.755291	0.927323	0.466162					0.697535
									#DIV/0!	#DIV/0!					#DIV/0!	#DIV/0!					#DIV/0!	#DIV/0!					#DIV/0!	#DIV/0!						#DIV/0!	#DIV/0!								#DIV/0!	#DIV/0!
24	0.790292	0.773255	1.02203	0.915807		24	0.479437	0.319972	1.49837	0.761985		24	0.540391	0.439569	1.22937	0.974406		24	0.91197	0.851344	1.07121	0.669363		24	0.697873	0.631651	1.10484	0.943918			24	0.175133	0.135391	1.29353	0.917564					24	0.776241	0.878162	0.883939	0.444353
	0.851797	0.773255	1.10157	0.987079			0.56466	0.319972	1.76472	0.897434			0.554585	0.439569	1.26166	1			1	0.851344	1.17461	0.733975			0.710068	0.631651	1.12415	0.960412				0.17318	0.135391	1.27911	0.907333						0.783357	0.878162	0.892042	0.448427				21	0.95334
	0.778945	0.773255	1.00736	0.902657			0.481532	0.319972	1.50492	0.765316			0.507696	0.439569	1.15498	0.915451			0.904931	0.851344	1.06294	0.664196			0.693144	0.631651	1.09735	0.937521				0.165897	0.135391	1.22531	0.869174						0.743664	0.878162	0.846841	0.425705					0.996787
									#DIV/0!	#DIV/0!					#DIV/0!	#DIV/0!					#DIV/0!	#DIV/0!					#DIV/0!	#DIV/0!						#DIV/0!	#DIV/0!								#DIV/0!	#DIV/0!					0.961011
3	0.529461	0.53119	0.996743	0.893146		3	0.640888	0.338545	1.89307	0.962706		3	0.176831	0.427577	0.413565	0.327796		3	0.730448	0.500608	1.45912	0.911753		3	0.511262	0.479266	1.06676	0.911384			3	0.582618	0.455634	1.2787	0.907042					3	0.886441	0.902256	0.982471	0.493885
	0.585666	0.53119	1.10255	0.987959			0.665715	0.338545	1.9664	1			0.189805	0.427577	0.443908	0.351846			0.801147	0.500608	1.60035	1			0.535825	0.479266	1.11801	0.955171				0.599167	0.455634	1.31502	0.932806						0.89437	0.902256	0.99126	0.498303				24	0.915807
	0.525687	0.53119	0.989639	0.88678			0.566715	0.338545	1.67397	0.851288			0.169592	0.427577	0.396635	0.314377			0.663771	0.500608	1.32593	0.828527			0.447226	0.479266	0.933147	0.797232				0.546429	0.455634	1.19927	0.850701						0.770506	0.902256	0.853978	0.429292					0.987079
									#DIV/0!	#DIV/0!					#DIV/0!	#DIV/0!					#DIV/0!	#DIV/0!					#DIV/0!	#DIV/0!						#DIV/0!	#DIV/0!								#DIV/0!	#DIV/0!					0.902657
6	0.0627861	0.0623229	1.00743	0.902725		6	0.199293	0.109268	1.8239	0.92753		6	0.342714	0.554045	0.618567	0.490282		6	0.666531	0.68469	0.973478	0.608292		6	0.700481	0.703954	0.995067	0.850134			6	0.786471	0.786128	1.00044	0.70966					6	0.8096	0.849463	0.953073	0.479107
	0.0695518	0.0623229	1.11599	1			0.201501	0.109268	1.84411	0.937808			0.342625	0.554045	0.618407	0.490155			0.704044	0.68469	1.02827	0.642528			0.679614	0.703954	0.965424	0.824808				0.737946	0.786128	0.93871	0.665873						0.844576	0.849463	0.994248	0.499805				3	0.893146
	0.0640689	0.0623229	1.02802	0.921169			0.177523	0.109268	1.62466	0.82621			0.34267	0.554045	0.618487	0.490219			0.631016	0.68469	0.921608	0.575881			0.664925	0.703954	0.944558	0.806982				0.718019	0.786128	0.913362	0.647893						0.759119	0.849463	0.893646	0.449233					0.987959
																																																	0.88678
																																																6	0.902725
																																																	1
																																																	0.921169
[truncated: 12 more columns]

## Sheet: rcv2aLD
LD rcv2a 2013 0416	Quantity	Norm Factor	Expr Level	Fold Change		LD rcv2a 2013 0515	Quantity	Norm Factor	Expr Level	Fold Change	LD rcv2a 2013 0821	Quantity	Norm Factor	Expr Level	Fold Change		LD rcv2a 2013 1016	Quantity	Norm Factor	Expr Level	Fold Change			LD rcv2a 2013 1031	Quantity	Norm Factor	Expr Level	Fold Change			LD rcv2a 2013 1205	Quantity	Norm Factor	Expr Level	Fold Change			LD rcv2a 2013 1212_2	Quantity	Norm Factor	Expr Level	Fold Change	LD rcv2a 2013 1212	Quantity	Norm Factor	Expr Level	Fold Change
9	0.829418	0.898536	0.923078	0.568157			0.153594	0.199372	0.770386	0.517446		0.158972	0.323295	0.491724	0.318795			0.758702	0.81159	0.934835	0.714627				0.380997	0.455702	0.836065	0.672074				0.209077	0.298984	0.699293	0.563166				0.38944	0.393363	0.990027	0.934415		0.477131	0.4974	0.959249	0.774342		9
	1	0.898536	1.11292	0.685007			0.161869	0.199372	0.811893	0.545325		0.166093	0.323295	0.513752	0.333076			0.860848	0.81159	1.06069	0.810839				0.409302	0.455702	0.898178	0.722003				0.223084	0.298984	0.746139	0.600894				0.400348	0.393363	1.01776	0.960588		0.48687	0.4974	0.97883	0.790147
	0.882147	0.898536	0.981761	0.604277			0.143177	0.199372	0.71814	0.482354		0.142035	0.323295	0.439337	0.284831			0.786225	0.81159	0.968748	0.740551				0.356907	0.455702	0.783202	0.629579				0.193666	0.298984	0.647747	0.521655				0.362142	0.393363	0.920632	0.868918		0.454312	0.4974	0.913372	0.737308
			#DIV/0!	#DIV/0!					#DIV/0!	#DIV/0!				#DIV/0!	#DIV/0!					#DIV/0!	#DIV/0!						#DIV/0!	#DIV/0!						#DIV/0!	#DIV/0!						#DIV/0!	#DIV/0!				#DIV/0!	#DIV/0!
12	0.37055	0.446284	0.8303	0.511053			0.629111	0.794253	0.792079	0.532016		0.472257	0.410992	1.14906	0.744962			0.671679	0.759806	0.884013	0.675776				0.228107	0.243328	0.937447	0.75357				0.544967	0.660756	0.824764	0.664212				0.435078	0.504824	0.861841	0.813429		0.60483	0.541254	1.11746	0.902055
	0.481283	0.446284	1.07842	0.663773			0.728221	0.794253	0.916862	0.61583		0.633934	0.410992	1.54245	1			0.859838	0.759806	1.13165	0.865084				0.227363	0.243328	0.93439	0.751112				0.512219	0.660756	0.775203	0.624299				0.542678	0.504824	1.07499	1.0146		0.670502	0.541254	1.23879	1		12
	0.513873	0.446284	1.15145	0.70872			0.637436	0.794253	0.80256	0.539057		0.508265	0.410992	1.23668	0.801764			0.750165	0.759806	0.98731	0.754741				0.214227	0.243328	0.880403	0.707715				0.53275	0.660756	0.806274	0.649322				0.470597	0.504824	0.9322	0.879836		0.59244	0.541254	1.09457	0.883578
			#DIV/0!	#DIV/0!					#DIV/0!	#DIV/0!				#DIV/0!	#DIV/0!					#DIV/0!	#DIV/0!						#DIV/0!	#DIV/0!						#DIV/0!	#DIV/0!						#DIV/0!	#DIV/0!				#DIV/0!	#DIV/0!
15	0.612789	0.554712	1.1047	0.679944			0.888056	0.671671	1.32216	0.888056		0.303931	0.497209	0.611275	0.396302			0.143801	0.222299	0.64688	0.494503				0.443949	0.440696	1.00738	0.809786				0.753773	0.7358	1.02443	0.825008				0.00994907	0.0124679	0.797977	0.753153		0.0122078	0.015311	0.797322	0.643628
	0.7181	0.554712	1.29454	0.796796			1	0.671671	1.48882	1		0.430275	0.497209	0.86538	0.561043			0.155964	0.222299	0.701597	0.53633				0.54823	0.440696	1.24401	1				0.903717	0.7358	1.22821	0.989122				0.0132099	0.0124679	1.05952	1		0.015214	0.015311	0.993666	0.802124
	0.672536	0.554712	1.21241	0.746239			0.898967	0.671671	1.3384	0.898967		0.381186	0.497209	0.766652	0.497036			0.132586	0.222299	0.596432	0.455937				0.460908	0.440696	1.04586	0.84072				0.796228	0.7358	1.08212	0.871475				0.0104243	0.0124679	0.83609	0.789125		0.0125095	0.015311	0.817027	0.659534		15
			#DIV/0!	#DIV/0!					#DIV/0!	#DIV/0!				#DIV/0!	#DIV/0!					#DIV/0!	#DIV/0!						#DIV/0!	#DIV/0!						#DIV/0!	#DIV/0!						#DIV/0!	#DIV/0!				#DIV/0!	#DIV/0!
18	0.349392	0.431119	0.81043	0.498822			0.535669	0.722032	0.741892	0.498307		0.798776	0.942817	0.847223	0.549272			0.824924	0.764442	1.07912	0.824924				0.945406	0.9169	1.03109	0.828845				0.830391	0.678557	1.22376	0.985539				0.75971	0.905737	0.838775	0.791659		0.847784	0.858561	0.987447	0.797104
	0.487818	0.431119	1.13152	0.696452			0.636762	0.722032	0.881904	0.592349		0.894998	0.942817	0.94928	0.615438			1	0.764442	1.30814	1				1	0.9169	1.09063	0.876708				0.842576	0.678557	1.24172	1				1	0.905737	1.10407	1.04205		1	0.858561	1.16474	0.940221
	0.440739	0.431119	1.02231	0.629237			0.584033	0.722032	0.808874	0.543297		0.777853	0.942817	0.82503	0.534884			0.881514	0.764442	1.15315	0.881514				0.858924	0.9169	0.936769	0.753025				0.703854	0.678557	1.03728	0.835361				0.86696	0.905737	0.957187	0.903419		0.85898	0.858561	1.00049	0.807631
			#DIV/0!	#DIV/0!					#DIV/0!	#DIV/0!				#DIV/0!	#DIV/0!					#DIV/0!	#DIV/0!						#DIV/0!	#DIV/0!						#DIV/0!	#DIV/0!						#DIV/0!	#DIV/0!				#DIV/0!	#DIV/0!		18
21	0.551962	0.370762	1.48873	0.916315			0.167087	0.225173	0.742038	0.498405		0.946741	0.838242	1.12944	0.732237			0.290744	0.361603	0.804042	0.614643				0.551027	0.492699	1.11839	0.899018				0.979241	0.911038	1.07486	0.865627				0.623477	0.647659	0.962663	0.908588		0.829355	0.755291	1.09806	0.886395
	0.602372	0.370762	1.62469	1			0.19398	0.225173	0.86147	0.578624		1	0.838242	1.19297	0.773429			0.358349	0.361603	0.991003	0.757564				0.564183	0.492699	1.14509	0.920483				1	0.911038	1.09765	0.883977				0.639368	0.647659	0.987199	0.931745		0.835593	0.755291	1.10632	0.893062
	0.537582	0.370762	1.44994	0.892443			0.1778	0.225173	0.789614	0.530361		0.806395	0.838242	0.962008	0.623689			0.322831	0.361603	0.892778	0.682477				0.49401	0.492699	1.00266	0.805992				0.872994	0.911038	0.958241	0.771707				0.571579	0.647659	0.882531	0.832957		0.706695	0.755291	0.935659	0.755299
			#DIV/0!	#DIV/0!					#DIV/0!	#DIV/0!				#DIV/0!	#DIV/0!					#DIV/0!	#DIV/0!						#DIV/0!	#DIV/0!						#DIV/0!	#DIV/0!						#DIV/0!	#DIV/0!				#DIV/0!	#DIV/0!
24	0.720387	0.773255	0.931629	0.573421			0.281067	0.319972	0.878411	0.590004		0.349066	0.439569	0.79411	0.514837			0.680018	0.851344	0.798758	0.610604				0.102436	0.135391	0.756595	0.608191				0.53732	0.631651	0.850659	0.685067				0.623403	0.727374	0.85706	0.808917		0.797334	0.878162	0.907958	0.732937		21
	0.959745	0.773255	1.24117	0.763947			0.294922	0.319972	0.921713	0.619088		0.369247	0.439569	0.840021	0.544603			0.800887	0.851344	0.940732	0.719135				0.100171	0.135391	0.739862	0.59474				0.544189	0.631651	0.861535	0.693826				0.609663	0.727374	0.83817	0.791088		0.785999	0.878162	0.89505	0.722518
	0.813146	0.773255	1.05159	0.647256			0.275152	0.319972	0.859926	0.577587		0.296449	0.439569	0.674407	0.437232			0.732297	0.851344	0.860166	0.657547				0.0987352	0.135391	0.729257	0.586216				0.520195	0.631651	0.823548	0.663234				0.539681	0.727374	0.741958	0.70028		0.740861	0.878162	0.843649	0.681025
			#DIV/0!	#DIV/0!					#DIV/0!	#DIV/0!				#DIV/0!	#DIV/0!					#DIV/0!	#DIV/0!						#DIV/0!	#DIV/0!						#DIV/0!	#DIV/0!						#DIV/0!	#DIV/0!				#DIV/0!	#DIV/0!
3	0.501171	0.53119	0.943487	0.580719			0.349565	0.338545	1.03255	0.693536		0.232192	0.427577	0.543042	0.352065			0.585209	0.500608	1.169	0.893629				0.385281	0.455634	0.845593	0.679732				0.406409	0.479266	0.847983	0.682912				0.604194	0.782041	0.772586	0.729187		0.570208	0.902256	0.63198	0.510158		24
	0.622954	0.53119	1.17275	0.721832			0.364219	0.338545	1.07584	0.722608		0.261739	0.427577	0.612146	0.396866			0.622484	0.500608	1.24346	0.950549				0.419111	0.455634	0.919842	0.739417				0.424882	0.479266	0.886527	0.713953				0.663337	0.782041	0.848212	0.800566		0.783415	0.902256	0.868284	0.700911
	0.502782	0.53119	0.946519	0.582585			0.299902	0.338545	0.885856	0.595004		0.22774	0.427577	0.532628	0.345314			0.598463	0.500608	1.19547	0.913869				0.379705	0.455634	0.833355	0.669895				0.372263	0.479266	0.776735	0.625534				0.632026	0.782041	0.808174	0.762777		0.643606	0.902256	0.71333	0.575826
			#DIV/0!	#DIV/0!					#DIV/0!	#DIV/0!				#DIV/0!	#DIV/0!					#DIV/0!	#DIV/0!						#DIV/0!	#DIV/0!						#DIV/0!	#DIV/0!						#DIV/0!	#DIV/0!				#DIV/0!	#DIV/0!
6	0.0634564	0.0623229	1.01819	0.626698			0.0856909	0.109268	0.78423	0.526745		0.285522	0.554045	0.515341	0.334106			0.645737	0.68469	0.943107	0.720951				0.676594	0.786128	0.860667	0.69185				0.625546	0.703954	0.888618	0.715637				0.597152	0.782959	0.762686	0.719844		0.882972	0.849463	1.03945	0.83908		3
	0.0828167	0.0623229	1.32883	0.817901			0.0838902	0.109268	0.76775	0.515676		0.337568	0.554045	0.609278	0.395008			0.661022	0.68469	0.965432	0.738017				0.693145	0.786128	0.881721	0.708774				0.648848	0.703954	0.92172	0.742295				0.722759	0.782959	0.923112	0.871258		0.874654	0.849463	1.02966	0.831176
	0.0719511	0.0623229	1.15449	0.710592			0.0720486	0.109268	0.659378	0.442885		0.259238	0.554045	0.4679	0.303349			0.630804	0.68469	0.921298	0.704279				0.654954	0.786128	0.83314	0.669722				0.560285	0.703954	0.795913	0.640978				0.587959	0.782959	0.750945	0.708763		0.75795	0.849463	0.892269	0.720273
																																								6
[truncated: 14 more columns]

## Sheet: rcv2bLD
LD rcv2b 2013 0416	Quantity	Norm Factor	Expr Level	Fold Change			LD rcv2b 2013 0515	Quantity	Norm Factor	Expr Level	Fold Change			LD rcv2b 2013 1016	Quantity	Norm Factor	Expr Level	Fold Change			LD rcv2b 2013 1031	Quantity	Norm Factor	Expr Level	Fold Change			LD rcv2b 2013 1205	Quantity	Norm Factor	Expr Level	Fold Change			LD rcv2b 2013 1205	Quantity	Norm Factor	Expr Level	Fold Change				9	0.802629	0.975428	0.73998	0.525294	0.511489	0.568826
9	1	0.898536	1.11292	0.802629				0.284874	0.199372	1.42885	0.975428				0.790412	0.81159	0.973905	0.73998				0.313815	0.455702	0.688639	0.525294				0.231443	0.298984	0.774097	0.511489				0.456962	0.4974	0.918701	0.568826					0.797807	1	0.746906	0.509369	0.519963	0.535798
	0.993993	0.898536	1.10624	0.797807				0.29205	0.199372	1.46485	1				0.79781	0.81159	0.983021	0.746906				0.3043	0.455702	0.667761	0.509369				0.235277	0.298984	0.786922	0.519963				0.43043	0.4974	0.865359	0.535798					0.662841	0.854585	0.743435	0.419499	0.515708	0.552065
	0.825838	0.898536	0.919093	0.662841				0.249582	0.199372	1.25184	0.854585				0.794102	0.81159	0.978453	0.743435				0.250612	0.455702	0.549946	0.419499				0.233352	0.298984	0.780483	0.515708				0.443498	0.4974	0.891631	0.552065
			#DIV/0!	#DIV/0!						#DIV/0!	#DIV/0!						#DIV/0!	#DIV/0!						#DIV/0!	#DIV/0!						#DIV/0!	#DIV/0!						#DIV/0!	#DIV/0!
12	0.550427	0.446284	1.23336	0.889485				1	0.794253	1.25904	0.859505				1	0.759806	1.31612	1				0.153915	0.243328	0.632539	0.482501				1	0.660756	1.51342	1				0.87417	0.541254	1.61508	1				12	0.889485	0.859505	1	0.482501	1	1
	0.618815	0.446284	1.3866	1				0.99543	0.794253	1.25329	0.855577				0.967231	0.759806	1.273	0.967231				0.14343	0.243328	0.589449	0.449632				0.973364	0.660756	1.47311	0.973364				0.76341	0.541254	1.41045	0.873297					1	0.855577	0.967231	0.449632	0.973364	0.873297
	0.482387	0.446284	1.0809	0.779532				0.997712	0.794253	1.25616	0.857539				0.892244	0.759806	1.17431	0.892244				0.127576	0.243328	0.524297	0.399934				0.831752	0.660756	1.25879	0.831752				0.816915	0.541254	1.5093	0.934504					0.779532	0.857539	0.892244	0.399934	0.831752	0.934504
			#DIV/0!	#DIV/0!						#DIV/0!	#DIV/0!						#DIV/0!	#DIV/0!						#DIV/0!	#DIV/0!						#DIV/0!	#DIV/0!						#DIV/0!	#DIV/0!
15	0.623418	0.554712	1.12386	0.810516				0.928539	0.671671	1.38243	0.943737				0.0890608	0.222299	0.400636	0.304406				0.549628	0.440696	1.24718	0.951351				0.870966	0.7358	1.1837	0.782135				0.00803375	0.015311	0.524705	0.324878
	0.758833	0.554712	1.36798	0.986572				0.924108	0.671671	1.37583	0.939233				0.0910655	0.222299	0.409654	0.311258				0.577735	0.440696	1.31096	1				0.825018	0.7358	1.12125	0.740874				0.00836091	0.015311	0.546072	0.338108				15	0.810516	0.943737	0.304406	0.951351	0.782135	0.324878
	0.527916	0.554712	0.951693	0.686352				0.926321	0.671671	1.37913	0.941482				0.0836847	0.222299	0.376452	0.28603				0.474093	0.440696	1.07578	0.820607				0.718089	0.7358	0.975929	0.64485				0.00723838	0.015311	0.472757	0.292714					0.986572	0.939233	0.311258	1	0.740874	0.338108
			#DIV/0!	#DIV/0!						#DIV/0!	#DIV/0!						#DIV/0!	#DIV/0!						#DIV/0!	#DIV/0!						#DIV/0!	#DIV/0!						#DIV/0!	#DIV/0!					0.686352	0.941482	0.28603	0.820607	0.64485	0.292714
18	0.284505	0.431119	0.659923	0.47593				0.611846	0.722032	0.847395	0.578487				0.679685	0.764442	0.889126	0.675564				0.973618	0.9169	1.06186	0.809986				0.602286	0.678557	0.887598	0.586486				1	0.858561	1.16474	0.721164
	0.292956	0.431119	0.679525	0.490067				0.597549	0.722032	0.827594	0.564969				0.663017	0.764442	0.867321	0.658996				1	0.9169	1.09063	0.831934				0.585571	0.678557	0.862965	0.570209				0.888679	0.858561	1.03508	0.640883
	0.245703	0.431119	0.569918	0.41102				0.604655	0.722032	0.837436	0.571688				0.589213	0.764442	0.770775	0.58564				0.73886	0.9169	0.805824	0.614683				0.478674	0.678557	0.705429	0.466116				0.942698	0.858561	1.098	0.679839
			#DIV/0!	#DIV/0!						#DIV/0!	#DIV/0!						#DIV/0!	#DIV/0!						#DIV/0!	#DIV/0!						#DIV/0!	#DIV/0!						#DIV/0!	#DIV/0!				18	0.47593	0.578487	0.675564	0.809986	0.586486	0.721164
21	0.0901168	0.370762	0.243059	0.175292				0.143684	0.225173	0.638103	0.43561				0.0882681	0.361603	0.244102	0.185471				0.212038	0.492699	0.430361	0.32828				0.421967	0.911038	0.463172	0.306044				0.290972	0.755291	0.385244	0.238529					0.490067	0.564969	0.658996	0.831934	0.570209	0.640883
	0.0850491	0.370762	0.22939	0.165434				0.155961	0.225173	0.692629	0.472833				0.0833216	0.361603	0.230423	0.175077				0.202709	0.492699	0.411426	0.313836				0.425017	0.911038	0.466519	0.308255				0.275872	0.755291	0.365253	0.226151					0.41102	0.571688	0.58564	0.614683	0.466116	0.679839
	0.0765712	0.370762	0.206524	0.148943				0.132425	0.225173	0.588102	0.401477				0.0753673	0.361603	0.208426	0.158363				0.178925	0.492699	0.363152	0.277013				0.363032	0.911038	0.398482	0.263299				0.283321	0.755291	0.375116	0.232258
			#DIV/0!	#DIV/0!						#DIV/0!	#DIV/0!						#DIV/0!	#DIV/0!						#DIV/0!	#DIV/0!						#DIV/0!	#DIV/0!						#DIV/0!	#DIV/0!
24	0.0796007	0.773255	0.102942	0.074241				0.03004	0.319972	0.0938831	0.0640907				0.114451	0.851344	0.134435	0.102145				0.00812662	0.135391	0.0600232	0.0457857				0.0971583	0.631651	0.153816	0.101635				0.145132	0.878162	0.165268	0.102328				21	0.175292	0.43561	0.185471	0.32828	0.306044	0.238529
	0.0867599	0.773255	0.112201	0.0809182				0.0302466	0.319972	0.0945289	0.0645316				0.114233	0.851344	0.13418	0.101951				0.00802549	0.135391	0.0592762	0.0452159				0.0968434	0.631651	0.153318	0.101306				0.150486	0.878162	0.171365	0.106103					0.165434	0.472833	0.175077	0.313836	0.308255	0.226151
	0.063758	0.773255	0.082454	0.059465				0.0301431	0.319972	0.0942055	0.0643107				0.110029	0.851344	0.129241	0.0981982				0.00720427	0.135391	0.0532107	0.0405891				0.0841025	0.631651	0.133147	0.0879777				0.147785	0.878162	0.168289	0.104198					0.148943	0.401477	0.158363	0.277013	0.263299	0.232258
			#DIV/0!	#DIV/0!						#DIV/0!	#DIV/0!						#DIV/0!	#DIV/0!						#DIV/0!	#DIV/0!						#DIV/0!	#DIV/0!						#DIV/0!	#DIV/0!
3	0.0704098	0.53119	0.132551	0.0955945				0.0592302	0.338545	0.174955	0.119436				0.0985517	0.500608	0.196864	0.149578				0.0534694	0.455634	0.117351	0.0895157				0.0973618	0.479266	0.203148	0.134231				0.197918	0.902256	0.219359	0.135819
	0.0770635	0.53119	0.145077	0.104628				0.0550302	0.338545	0.162549	0.110967				0.111219	0.500608	0.222168	0.168805				0.0506746	0.455634	0.111218	0.0848369				0.0946216	0.479266	0.19743	0.130453				0.179937	0.902256	0.19943	0.12348				24	0.074241	0.0640907	0.102145	0.0457857	0.101635	0.102328
	0.0585687	0.53119	0.110259	0.079518				0.0570916	0.338545	0.168638	0.115123				0.0918661	0.500608	0.183509	0.139431				0.0458031	0.455634	0.100526	0.0766813				0.0800306	0.479266	0.166986	0.110337				0.188714	0.902256	0.209157	0.129503					0.0809182	0.0645316	0.101951	0.0452159	0.101306	0.106103
			#DIV/0!	#DIV/0!						#DIV/0!	#DIV/0!						#DIV/0!	#DIV/0!						#DIV/0!	#DIV/0!						#DIV/0!	#DIV/0!						#DIV/0!	#DIV/0!					0.059465	0.0643107	0.0981982	0.0405891	0.0879777	0.104198
6	0.00530908	0.0623229	0.0851866	0.0614358				0.0392467	0.109268	0.35918	0.2452				0.286653	0.68469	0.41866	0.318101				0.28144	0.786128	0.358008	0.273089				0.330164	0.703954	0.469013	0.309903				0.506265	0.849463	0.595983	0.369011
	0.00615705	0.0623229	0.0987928	0.0712485				0.0513277	0.109268	0.469743	0.320677				0.284899	0.68469	0.416098	0.316154				0.274889	0.786128	0.349675	0.266732				0.304245	0.703954	0.432195	0.285575				0.457003	0.849463	0.53799	0.333104
	0.00500558	0.0623229	0.0803169	0.0579238				0.0448826	0.109268	0.410759	0.28041				0.257944	0.68469	0.376731	0.286242				0.242793	0.786128	0.308847	0.235588				0.31694	0.703954	0.450228	0.297491				0.481004	0.849463	0.566245	0.350598				3	0.0955945	0.119436	0.149578	0.0895157	0.134231	0.135819
																																												0.104628	0.110967	0.168805	0.0848369	0.130453	0.12348
																																												0.079518	0.115123	0.139431	0.0766813	0.110337	0.129503
																																											6	0.0614358	0.2452	0.318101	0.273089	0.309903	0.369011
																																												0.0712485	0.320677	0.316154	0.266732	0.285575	0.333104
																																												0.0579238	0.28041	0.286242	0.235588	0.297491	0.350598

## Sheet: rcv1aDD
DD rcv1a 2013 0821	Quantity	Norm Factor	Expr Level	Fold Change			DD rcv1a 2013 1003	Quantity	Norm Factor	Expr Level	Fold Change			DD rcv1a 2013 1211	Quantity	Norm Factor	Expr Level	Fold Change		DD rcv1a 2013 1211	Quantity	Norm Factor	Expr Level	Fold Change		DD rcv1a 2013 1218	Quantity	Norm Factor	Expr Level	Fold Change			Fold Change	Fold Change	Fold Change	Fold Change	Fold Change							9	0.752064	0.0406251
9	0.784654	0.960159	0.817212	0.530988				0.678947	0.547721	1.23959	0.744765				0.663742	0.562165	1.18069	0.751978			0.910315	0.915708	0.99411	0.591682			0.910315	0.915708	0.99411	0.591682		9	0.530988	0.744765	0.751978	0.447568	0.591682		average	sd				12	0.67266	0.0634328
	0.747494	0.960159	0.77851	0.505842				0.689541	0.547721	1.25893	0.756387				0.639335	0.562165	1.13727	0.724326			1	0.915708	1.09205	0.649975			1	0.915708	1.09205	0.649975			0.505842	0.756387	0.724326	0.43111	0.649975		0.603715	0.126304				15	0.949179	0.0630236
	0.707971	0.960159	0.737348	0.479096				0.6503	0.547721	1.18728	0.713341				0.613376	0.562165	1.0911	0.694916			0.954104	0.915708	1.04193	0.620144			0.954104	0.915708	1.04193	0.620144			0.479096	0.713341	0.694916	0.413605	0.620144		normalized		sed			18	0.93366	0.0520404
			#DIV/0!	#DIV/0!						#DIV/0!	#DIV/0!						#DIV/0!	#DIV/0!					#DIV/0!	#DIV/0!					#DIV/0!	#DIV/0!			#DIV/0!	#DIV/0!	#DIV/0!	#DIV/0!	#DIV/0!		0.752064	0.15734	0.0406251			21	1	0.0520231
12	0.354757	0.504509	0.703174	0.456891				0.633891	0.42613	1.48755	0.893748				0.71562	0.913994	0.782959	0.498664			0.908937	0.913613	0.994882	0.592142			0.908937	0.913613	0.994882	0.592142		12	0.456891	0.893748	0.498664	0.296799	0.592142		average	sd	#VALUE!			24	0.813836	0.0553815
	0.39376	0.504509	0.780482	0.507122				0.644234	0.42613	1.51182	0.908331				0.694622	0.913994	0.759986	0.484033			0.881202	0.913613	0.964525	0.574073			0.881202	0.913613	0.964525	0.574073			0.507122	0.908331	0.484033	0.28809	0.574073		0.539973	0.197213	0.0569306			3	0.705165	0.0557039
	0.365347	0.504509	0.724164	0.470529				0.564247	0.42613	1.32412	0.795554				0.675249	0.913994	0.738789	0.470532			0.894962	0.913613	0.979586	0.583037			0.894962	0.913613	0.979586	0.583037			0.470529	0.795554	0.470532	0.280055	0.583037		normalized		0			6	0.546873	0.0521643
			#DIV/0!	#DIV/0!						#DIV/0!	#DIV/0!						#DIV/0!	#DIV/0!					#DIV/0!	#DIV/0!					#DIV/0!	#DIV/0!			#DIV/0!	#DIV/0!	#DIV/0!	#DIV/0!	#DIV/0!		0.67266	0.245674	0.0634328
15	0.482301	0.376555	1.28083	0.832224				0.705098	0.532839	1.32328	0.795053				0.377961	0.240722	1.57011	1			0.806423	0.841671	0.958121	0.570262			0.806423	0.841671	0.958121	0.570262		15	0.832224	0.795053	1	0.595188	0.570262		average	sd	#VALUE!
	0.579534	0.376555	1.53904	1				0.886856	0.532839	1.6644	1				0.35848	0.240722	1.48919	0.948459			0.826961	0.841671	0.982523	0.584785			0.826961	0.841671	0.982523	0.584785			1	1	0.948459	0.564511	0.584785		0.761947	0.195941	0.0565634
	0.528687	0.376555	1.40401	0.912263				0.535922	0.532839	1.00578	0.604294				0.361071	0.240722	1.49995	0.955313			0.704615	0.841671	0.837162	0.498269			0.704615	0.841671	0.837162	0.498269			0.912263	0.604294	0.955313	0.568591	0.498269		normalized		0
			#DIV/0!	#DIV/0!						#DIV/0!	#DIV/0!						#DIV/0!	#DIV/0!					#DIV/0!	#DIV/0!					#DIV/0!	#DIV/0!			#DIV/0!	#DIV/0!	#DIV/0!	#DIV/0!	#DIV/0!		0.949179	0.244089	0.0630236
18	0.796955	0.564156	1.41265	0.917878				0.947982	0.660325	1.43563	0.862552				0.369808	0.260264	1.42089	0.904964			0.904667	0.863656	1.04749	0.62345			0.904667	0.863656	1.04749	0.62345		18	0.917878	0.862552	0.904964	0.538623	0.62345		average	sd	#VALUE!
	0.753439	0.564156	1.33552	0.867759				0.959198	0.660325	1.45262	0.872758				0.36102	0.260264	1.38713	0.883458			0.947501	0.863656	1.09708	0.652969			0.947501	0.863656	1.09708	0.652969			0.867759	0.872758	0.883458	0.525823	0.652969		0.74949	0.161794	0.046706
	0.774892	0.564156	1.37354	0.892467				0.861658	0.660325	1.3049	0.784007				0.352593	0.260264	1.35475	0.862837			0.782485	0.863656	0.906015	0.539249			0.782485	0.863656	0.906015	0.539249			0.892467	0.784007	0.862837	0.51355	0.539249		normalized		0
			#DIV/0!	#DIV/0!						#DIV/0!	#DIV/0!						#DIV/0!	#DIV/0!					#DIV/0!	#DIV/0!					#DIV/0!	#DIV/0!			#DIV/0!	#DIV/0!	#DIV/0!	#DIV/0!	#DIV/0!		0.93366	0.201552	0.0520404
21	0.659153	0.556796	1.18383	0.769202				0.833481	0.585745	1.42294	0.85493				0.996212	0.70506	1.41295	0.899902			0.607745	0.369957	1.64275	0.977742			0.607745	0.369957	1.64275	0.977742		21	0.769202	0.85493	0.899902	0.53561	0.977742		average	sd	#VALUE!
	0.648977	0.556796	1.16556	0.757327				0.865268	0.585745	1.47721	0.887534				1	0.70506	1.41832	0.903323			0.62158	0.369957	1.68014	1			0.62158	0.369957	1.68014	1			0.757327	0.887534	0.903323	0.537647	1		0.802744	0.16174	0.0466904
	0.654045	0.556796	1.17466	0.763242				0.709396	0.585745	1.2111	0.727651				0.998104	0.70506	1.41563	0.901611			0.614624	0.369957	1.66134	0.988808			0.614624	0.369957	1.66134	0.988808			0.763242	0.727651	0.901611	0.536628	0.988808		normalized		0
			#DIV/0!	#DIV/0!						#DIV/0!	#DIV/0!						#DIV/0!	#DIV/0!					#DIV/0!	#DIV/0!					#DIV/0!	#DIV/0!			#DIV/0!	#DIV/0!	#DIV/0!	#DIV/0!	#DIV/0!		1	0.201484	0.0520231
24	0.961805	0.769095	1.25057	0.812563				0.694583	0.678711	1.02338	0.614868				0.665259	0.664282	1.00147	0.637834			0.882382	0.606426	1.45505	0.866029			0.882382	0.606426	1.45505	0.866029		24	0.812563	0.614868	0.637834	0.379631	0.866029		average	sd	#VALUE!
	1	0.769095	1.30023	0.844831				0.686621	0.678711	1.01165	0.60782				0.679688	0.664282	1.02319	0.651668			0.850956	0.606426	1.40323	0.835186			0.850956	0.606426	1.40323	0.835186			0.844831	0.60782	0.651668	0.387865	0.835186		0.653302	0.172182	0.0497046
	0.980716	0.769095	1.27516	0.82854				0.623209	0.678711	0.918223	0.551685				0.669466	0.664282	1.0078	0.641867			0.771407	0.606426	1.27205	0.757111			0.771407	0.606426	1.27205	0.757111			0.82854	0.551685	0.641867	0.382031	0.757111		normalized		0
			#DIV/0!	#DIV/0!						#DIV/0!	#DIV/0!						#DIV/0!	#DIV/0!					#DIV/0!	#DIV/0!					#DIV/0!	#DIV/0!			#DIV/0!	#DIV/0!	#DIV/0!	#DIV/0!	#DIV/0!		0.813836	0.214492	0.0553815
3	0.244126	0.313069	0.779785	0.50667				0.91741	0.702157	1.30656	0.785005				0.601708	0.715572	0.840877	0.535552			0.780743	0.610881	1.27806	0.760685			0.780743	0.610881	1.27806	0.760685		3	0.50667	0.785005	0.535552	0.318754	0.760685		average	sd	#VALUE!
	0.253624	0.313069	0.810122	0.526382				1	0.702157	1.42418	0.855675				0.618153	0.715572	0.863859	0.550189			0.63275	0.610881	1.0358	0.616495			0.63275	0.610881	1.0358	0.616495			0.526382	0.855675	0.550189	0.327466	0.616495		0.566067	0.173184	0.049994
	0.244836	0.313069	0.782052	0.508143				0.868701	0.702157	1.23719	0.743325				0.556738	0.715572	0.778032	0.495527			0.683767	0.610881	1.11931	0.666201			0.683767	0.610881	1.11931	0.666201			0.508143	0.743325	0.495527	0.294931	0.666201		normalized		0
			#DIV/0!	#DIV/0!						#DIV/0!	#DIV/0!						#DIV/0!	#DIV/0!					#DIV/0!	#DIV/0!					#DIV/0!	#DIV/0!			#DIV/0!	#DIV/0!	#DIV/0!	#DIV/0!	#DIV/0!		0.705165	0.21574	0.0557039
6	0.0184129	0.050104	0.367494	0.238781				0.886994	0.858709	1.03294	0.620608				0.610925	0.790428	0.772905	0.492261			0.73144	0.706853	1.03478	0.615891			0.73144	0.706853	1.03478	0.615891		6	0.238781	0.620608	0.492261	0.292988	0.615891		average	sd	#VALUE!
	0.0181771	0.050104	0.362787	0.235723				0.91126	0.858709	1.0612	0.637586				0.593669	0.790428	0.751073	0.478356			0.762523	0.706853	1.07876	0.642063			0.762523	0.706853	1.07876	0.642063			0.235723	0.637586	0.478356	0.284712	0.642063		0.438999	0.162179	0.0468172
	0.0182946	0.050104	0.365133	0.237247				0.791902	0.858709	0.9222	0.554074				0.559931	0.790428	0.70839	0.451172			0.635361	0.706853	0.89886	0.53499			0.635361	0.706853	0.89886	0.53499			0.237247	0.554074	0.451172	0.268532	0.53499		normalized		0
																																							0.546873	0.202031	0.0521643

## Sheet: rcv2a DD
DD rcv2a 2013 0821	Quantity	Norm Factor	Expr Level	Fold Change			DD rcv2a 2013 1003	Quantity	Norm Factor	Expr Level	Fold Change			DD rcv2a 2013 1211	Quantity	Norm Factor	Expr Level	Fold Change		DD rcv2a 2013 1211_2	Quantity	Norm Factor	Expr Level	Fold Change		DD rcv2a 2013 1218	Quantity	Norm Factor	Expr Level	Fold Change			Fold Change	Fold Change	Fold Change	Fold Change	Fold Change
9	0.892728	0.960159	0.929771	0.390725				0.473739	0.547721	0.864928	0.742722				0.47087	0.562165	0.837601	0.765563			0.484417	0.455397	1.06372	0.746305			0.920218	0.915708	1.00492	0.786243		9	0.390725	0.742722	0.765563	0.746305	0.786243		average	sd	sed
	1	0.960159	1.04149	0.437676				0.51931	0.547721	0.948129	0.814167				0.4482	0.562165	0.797275	0.728705			0.549028	0.455397	1.2056	0.845846			1	0.915708	1.09205	0.85441			0.437676	0.814167	0.728705	0.845846	0.85441		0.701071	0.159706	0.041236
	0.877039	0.960159	0.913431	0.383859				0.477303	0.547721	0.871435	0.748309				0.444315	0.562165	0.790365	0.722389			0.473528	0.455397	1.03981	0.729529			0.95928	0.915708	1.04758	0.819618			0.383859	0.748309	0.722389	0.729529	0.819618		normalized		sed
			#DIV/0!	#DIV/0!						#DIV/0!	#DIV/0!						#DIV/0!	#DIV/0!					#DIV/0!	#DIV/0!					#DIV/0!	#DIV/0!			#DIV/0!	#DIV/0!	#DIV/0!	#DIV/0!	#DIV/0!		0.858742	0.195624	0.05051
12	0.476143	0.504509	0.943776	0.396611				0.44455	0.42613	1.04322	0.895827				0.978489	0.913994	1.07056	0.978489			0.879654	0.898169	0.979386	0.687134			0.769362	0.913613	0.842109	0.658858		12	0.396611	0.895827	0.978489	0.687134	0.658858		average	sd	sed
	0.534632	0.504509	1.05971	0.445329				0.419894	0.42613	0.985366	0.846142				1	0.913994	1.0941	1			1	0.898169	1.11338	0.781141			0.938211	0.913613	1.02692	0.803456			0.445329	0.846142	1	0.781141	0.803456		0.739743	0.197644	0.0510315			9	0.858742	0.05051
	0.484925	0.504509	0.961183	0.403926				0.391944	0.42613	0.919774	0.789819				0.965546	0.913994	1.0564	0.965546			0.916985	0.898169	1.02095	0.716295			0.849602	0.913613	0.929937	0.727573			0.403926	0.789819	0.965546	0.716295	0.727573		normalized		0			12	0.906111	0.0625085
			#DIV/0!	#DIV/0!						#DIV/0!	#DIV/0!						#DIV/0!	#DIV/0!					#DIV/0!	#DIV/0!					#DIV/0!	#DIV/0!			#DIV/0!	#DIV/0!	#DIV/0!	#DIV/0!	#DIV/0!		0.906111	0.242094	0.0625085			15	1	0.0306922
15	0.756039	0.376555	2.00778	0.843745				0.468792	0.532839	0.8798	0.755492				0.221058	0.240722	0.918312	0.839332			0.845351	0.855291	0.988378	0.693442			0.878445	0.841671	1.04369	0.816574		15	0.843745	0.755492	0.839332	0.693442	0.816574		average	sd	sed			18	0.71711	0.0525933
	0.896052	0.376555	2.3796	1				0.502832	0.532839	0.943685	0.810351				0.224894	0.240722	0.934248	0.853897			0.98028	0.855291	1.14614	0.804125			0.962336	0.841671	1.14336	0.894557			1	0.810351	0.853897	0.804125	0.894557		0.816393	0.0970451	0.0250569			21	0.798905	0.0606328
	0.874183	0.376555	2.32153	0.975594				0.44194	0.532839	0.829405	0.712218				0.221979	0.240722	0.922137	0.842828			0.782447	0.855291	0.914831	0.641842			0.81963	0.841671	0.973813	0.761902			0.975594	0.712218	0.842828	0.641842	0.761902		normalized		0			24	0.746954	0.0575366
			#DIV/0!	#DIV/0!						#DIV/0!	#DIV/0!						#DIV/0!	#DIV/0!					#DIV/0!	#DIV/0!					#DIV/0!	#DIV/0!			#DIV/0!	#DIV/0!	#DIV/0!	#DIV/0!	#DIV/0!		1	0.11887	0.0306922			3	0.850106	0.0681815
18	0.604126	0.564156	1.07085	0.450012				0.589689	0.660325	0.893028	0.766852				0.155284	0.260264	0.59664	0.545326			0.25364	0.477654	0.531011	0.372555			0.680138	0.863656	0.787511	0.616141		18	0.450012	0.766852	0.545326	0.372555	0.616141		average	sd	sed			6	0.920391	0.0972452
	0.732165	0.564156	1.29781	0.545388				0.624425	0.660325	0.945633	0.812024				0.167113	0.260264	0.642091	0.586868			0.259675	0.477654	0.543646	0.38142			0.928506	0.863656	1.07509	0.841139			0.545388	0.812024	0.586868	0.38142	0.841139		0.585444	0.166294	0.0429368
	0.665071	0.564156	1.17888	0.49541				0.556251	0.660325	0.842389	0.723367				0.161138	0.260264	0.619133	0.565884			0.217947	0.477654	0.456286	0.320128			0.837995	0.863656	0.970288	0.759144			0.49541	0.723367	0.565884	0.320128	0.759144		normalized		0
			#DIV/0!	#DIV/0!						#DIV/0!	#DIV/0!						#DIV/0!	#DIV/0!					#DIV/0!	#DIV/0!					#DIV/0!	#DIV/0!			#DIV/0!	#DIV/0!	#DIV/0!	#DIV/0!	#DIV/0!		0.71711	0.203693	0.0525933
21	0.494595	0.556796	0.888289	0.373293				0.5799	0.585745	0.990021	0.85014				0.472339	0.70506	0.669927	0.61231			0.514954	0.626012	0.822594	0.577129			0.40894	0.369957	1.10537	0.864833		21	0.373293	0.85014	0.61231	0.577129	0.864833		average	sd	sed
	0.512792	0.556796	0.92097	0.387027				0.622003	0.585745	1.0619	0.911864				0.486694	0.70506	0.690287	0.630919			0.547455	0.626012	0.874511	0.613554			0.420164	0.369957	1.13571	0.88857			0.387027	0.911864	0.630919	0.613554	0.88857		0.65222	0.191713	0.0495002
	0.503612	0.556796	0.904482	0.380098				0.512	0.585745	0.874101	0.750598				0.445233	0.70506	0.631483	0.577172			0.456921	0.626012	0.729892	0.512089			0.403681	0.369957	1.09116	0.85371			0.380098	0.750598	0.577172	0.512089	0.85371		normalized		0
			#DIV/0!	#DIV/0!						#DIV/0!	#DIV/0!						#DIV/0!	#DIV/0!					#DIV/0!	#DIV/0!					#DIV/0!	#DIV/0!			#DIV/0!	#DIV/0!	#DIV/0!	#DIV/0!	#DIV/0!		0.798905	0.23483	0.0606328
24	0.703911	0.769095	0.915245	0.384621				0.706936	0.678711	1.04159	0.894419				0.363873	0.664282	0.547769	0.500658			0.490099	0.609855	0.803632	0.563825			0.538107	0.606426	0.887342	0.694248		24	0.384621	0.894419	0.500658	0.563825	0.694248		average	sd	sed
	0.78048	0.769095	1.0148	0.426459				0.667554	0.678711	0.983561	0.844592				0.380651	0.664282	0.573027	0.523743			0.510553	0.609855	0.837172	0.587357			0.670082	0.606426	1.10497	0.864517			0.426459	0.844592	0.523743	0.587357	0.864517		0.609808	0.181924	0.0469725
	0.665227	0.769095	0.864948	0.363484				0.645892	0.678711	0.951645	0.817186				0.341858	0.664282	0.514628	0.470368			0.427896	0.609855	0.701636	0.492265			0.557591	0.606426	0.91947	0.719385			0.363484	0.817186	0.470368	0.492265	0.719385		normalized		0
			#DIV/0!	#DIV/0!						#DIV/0!	#DIV/0!						#DIV/0!	#DIV/0!					#DIV/0!	#DIV/0!					#DIV/0!	#DIV/0!			#DIV/0!	#DIV/0!	#DIV/0!	#DIV/0!	#DIV/0!		0.746954	0.222838	0.0575366
3	0.26959	0.313069	0.86112	0.361876				0.737428	0.702157	1.05023	0.901844				0.61859	0.715572	0.86447	0.790121			0.693646	0.878569	0.789517	0.553922			0.680074	0.610881	1.11327	0.871009		3	0.361876	0.901844	0.790121	0.553922	0.871009		average	sd	sed
	0.274663	0.313069	0.877325	0.368685				0.700406	0.702157	0.997507	0.856568				0.703656	0.715572	0.983349	0.898775			0.802369	0.878569	0.913267	0.640745			0.776031	0.610881	1.27035	0.993908			0.368685	0.856568	0.898775	0.640745	0.993908		0.694021	0.215581	0.0556629
	0.25583	0.313069	0.817168	0.343405				0.616445	0.702157	0.877931	0.753887				0.568728	0.715572	0.794788	0.726432			0.663961	0.878569	0.75573	0.530217			0.639401	0.610881	1.04669	0.818917			0.343405	0.753887	0.726432	0.530217	0.818917		normalized		0
			#DIV/0!	#DIV/0!						#DIV/0!	#DIV/0!						#DIV/0!	#DIV/0!					#DIV/0!	#DIV/0!					#DIV/0!	#DIV/0!			#DIV/0!	#DIV/0!	#DIV/0!	#DIV/0!	#DIV/0!		0.850106	0.264066	0.0681815
6	0.0204394	0.050104	0.407939	0.171432				1	0.858709	1.16454	1				0.725198	0.790428	0.917476	0.838568			0.838932	0.63622	1.31862	0.925138			0.742308	0.706853	1.05016	0.821634		6	0.171432	1	0.838568	0.925138	0.821634		average	sd	sed
	0.0241586	0.050104	0.482169	0.202626				0.990791	0.858709	1.15381	0.990791				0.736251	0.790428	0.931459	0.851348			0.906818	0.63622	1.42532	1			0.903453	0.706853	1.27813	1			0.202626	0.990791	0.851348	1	1		0.751401	0.307477	0.0793903
	0.0182118	0.050104	0.36348	0.152748				0.90479	0.858709	1.05366	0.90479				0.686403	0.790428	0.868395	0.793708			0.744708	0.63622	1.17052	0.821232			0.720046	0.706853	1.01867	0.796994			0.152748	0.90479	0.793708	0.821232	0.796994		normalized		0
																																							0.920391	0.376629	0.0972452

## Sheet: rcv2b DD
DD rcv2b2013 0821	Quantity	Norm Factor	Expr Level	Fold Change			DD rcv2b2013 1003	Quantity	Norm Factor	Expr Level	Fold Change			DD rcv2b 2013 1211	Quantity	Norm Factor	Expr Level	Fold Change									Fold Change	Fold Change	Fold Change
9	0.982695	0.960159	1.02347	0.982695				1	0.547721	1.82575	1				0.452793	0.562165	0.805445	0.736173								9	0.982695	1	0.736173			average	sd	sed
	1	0.960159	1.04149	1				0.958713	0.547721	1.75037	0.958713				0.461951	0.562165	0.821736	0.751062									1	0.958713	0.751062			0.854163	0.147816	0.0492721	9	0.981788	0.0566341
	0.897263	0.960159	0.934495	0.897263				0.776377	0.547721	1.41747	0.776377				0.359926	0.562165	0.64025	0.585185									0.897263	0.776377	0.585185			normalized		sed	12	1	0.0979845
			#DIV/0!	#DIV/0!						#DIV/0!	#DIV/0!						#DIV/0!	#DIV/0!									#DIV/0!	#DIV/0!	#DIV/0!			0.981788	0.169902	0.0566341	15	0.468261	0.0854471
12	0.496177	0.504509	0.983486	0.944302				0.644684	0.42613	1.51288	0.828636				1	0.913994	1.0941	1								12	0.944302	0.828636	1			average	sd	sed	18	0.28426	0.045345
	0.519848	0.504509	1.0304	0.989351				0.554059	0.42613	1.30021	0.712153				0.910043	0.913994	0.995676	0.910043									0.989351	0.712153	0.910043			0.870008	0.119754	0.0399179	21	0.172813	0.0364153
	0.507875	0.504509	1.00667	0.966564				0.531154	0.42613	1.24646	0.682712				0.796307	0.913994	0.871238	0.796307									0.966564	0.682712	0.796307			normalized		0	24	0.152564	0.0345099
			#DIV/0!	#DIV/0!						#DIV/0!	#DIV/0!						#DIV/0!	#DIV/0!									#DIV/0!	#DIV/0!	#DIV/0!			1	0.293953	0.0979845	3	0.295034	0.0635677
15	0.106428	0.376555	0.282636	0.271375				0.754261	0.532839	1.41555	0.775327				0.0622345	0.240722	0.258533	0.236297								15	0.271375	0.775327	0.236297			average	sd	sed	6	0.410228	0.0705345
	0.12002	0.376555	0.318732	0.306033				0.703002	0.532839	1.31935	0.722636				0.0628552	0.240722	0.261111	0.238654									0.306033	0.722636	0.238654			0.407391	0.223019	0.0743397
	0.11302	0.376555	0.300142	0.288184				0.574491	0.532839	1.07817	0.590536				0.0625441	0.240722	0.259819	0.237473									0.288184	0.590536	0.237473			normalized		0
			#DIV/0!	#DIV/0!						#DIV/0!	#DIV/0!						#DIV/0!	#DIV/0!									#DIV/0!	#DIV/0!	#DIV/0!			0.468261	0.256341	0.0854471
18	0.15648	0.564156	0.27737	0.266319				0.464249	0.660325	0.703062	0.385082				0.0288604	0.260264	0.110889	0.101352								18	0.266319	0.385082	0.101352			average	sd	sed
	0.179909	0.564156	0.3189	0.306195				0.469168	0.660325	0.71051	0.389161				0.0278853	0.260264	0.107142	0.0979276									0.306195	0.389161	0.0979276			0.247309	0.118351	0.0394505
	0.167786	0.564156	0.297411	0.285562				0.355112	0.660325	0.537783	0.294555				0.0283687	0.260264	0.109	0.099625									0.285562	0.294555	0.099625			normalized		0
			#DIV/0!	#DIV/0!						#DIV/0!	#DIV/0!						#DIV/0!	#DIV/0!									#DIV/0!	#DIV/0!	#DIV/0!			0.28426	0.136035	0.045345
21	0.0815765	0.556796	0.146511	0.140674				0.292494	0.585745	0.499355	0.273507				0.0371829	0.70506	0.0527372	0.0482015								21	0.140674	0.273507	0.0482015			average	sd	sed
	0.0827532	0.556796	0.148624	0.142703				0.298666	0.585745	0.509891	0.279278				0.0362225	0.70506	0.0513751	0.0469566									0.142703	0.279278	0.0469566			0.150348	0.0950448	0.0316816
	0.0821628	0.556796	0.147564	0.141685				0.25379	0.585745	0.433278	0.237315				0.0330287	0.70506	0.0468453	0.0428163									0.141685	0.237315	0.0428163			normalized		0
			#DIV/0!	#DIV/0!						#DIV/0!	#DIV/0!						#DIV/0!	#DIV/0!									#DIV/0!	#DIV/0!	#DIV/0!			0.172813	0.109246	0.0364153
24	0.103452	0.769095	0.134511	0.129152				0.297349	0.678711	0.438108	0.239961				0.0252796	0.664282	0.0380556	0.0347826								24	0.129152	0.239961	0.0347826			average	sd	sed
	0.0928325	0.769095	0.120704	0.115895				0.322609	0.678711	0.475325	0.260346				0.0254514	0.664282	0.0383141	0.0350189									0.115895	0.260346	0.0350189			0.132732	0.0900716	0.0300239
	0.0979985	0.769095	0.12742	0.122344				0.275328	0.678711	0.405662	0.22219				0.0253654	0.664282	0.0381846	0.0349005									0.122344	0.22219	0.0349005			normalized		0
			#DIV/0!	#DIV/0!						#DIV/0!	#DIV/0!						#DIV/0!	#DIV/0!									#DIV/0!	#DIV/0!	#DIV/0!			0.152564	0.10353	0.0345099
3	0.0557984	0.313069	0.17823	0.17113				0.590719	0.702157	0.841293	0.460794				0.0975531	0.715572	0.136329	0.124604								3	0.17113	0.460794	0.124604			average	sd	sed
	0.0613752	0.313069	0.196044	0.188233				0.625876	0.702157	0.891361	0.488217				0.093725	0.715572	0.130979	0.119714									0.188233	0.488217	0.119714			0.256682	0.165913	0.0553043
	0.0585204	0.313069	0.186925	0.179478				0.608044	0.702157	0.865965	0.474307				0.0811543	0.715572	0.113412	0.103658									0.179478	0.474307	0.103658			normalized		0
			#DIV/0!	#DIV/0!						#DIV/0!	#DIV/0!						#DIV/0!	#DIV/0!									#DIV/0!	#DIV/0!	#DIV/0!			0.295034	0.190703	0.0635677
6	0.00676465	0.050104	0.135012	0.129633				0.935037	0.858709	1.08889	0.596406				0.317376	0.790428	0.401524	0.366991								6	0.129633	0.596406	0.366991			average	sd	sed
	0.00830568	0.050104	0.165769	0.159165				0.910273	0.858709	1.06005	0.58061				0.305507	0.790428	0.386509	0.353267									0.159165	0.58061	0.353267			0.356902	0.184097	0.0613656
	0.00749566	0.050104	0.149602	0.143642				0.818915	0.858709	0.953658	0.522338				0.311385	0.790428	0.393945	0.360064									0.143642	0.522338	0.360064			normalized		0
																																0.410228	0.211604	0.0705345

## Sheet: rcv1aAD
AD rcv1a 2013 1104	Quantity	Norm Factor	Expr Level	Fold Change			AD rcv1a 2013 1210	Quantity	Norm Factor	Expr Level	Fold Change			AD rcv1a 2013 1113	Quantity	Norm Factor	Expr Level	Fold Change		ADrcv1a 2013 1218	Quantity	Norm Factor	Expr Level	Fold Change				Fold Change		Fold Change	Fold Change
9	0.0421396	0.0439707	0.958356	0.780644				1	0.748294	1.33637	1				0.466658	0.669687	0.696831	0.567594			0.613695	0.790152	0.77668	0.556429			9	0.780644		0.567594	0.556429		average	sd	sed
	0.03602	0.0439707	0.81918	0.667276				0.919655	0.748294	1.229	0.919655				0.474357	0.669687	0.708326	0.576958			0.650337	0.790152	0.823054	0.589652				0.667276		0.576958	0.589652		0.59207	0.0877503
	0.0320994	0.0439707	0.730018	0.594647				0.905868	0.748294	1.21058	0.905868				0.421801	0.669687	0.629848	0.513034			0.532045	0.790152	0.673345	0.482398				0.594647		0.513034	0.482398		normalized		sed		9	0.839691	0.0629027
			#DIV/0!	#DIV/0!						#DIV/0!	#DIV/0!						#DIV/0!	#DIV/0!					#DIV/0!	#DIV/0!				#DIV/0!		#DIV/0!	#DIV/0!		0.67415	0.0999153	0.0288431		12	0.965057	0.0656816
12	0.741881	0.61606	1.20424	0.980929				0.468669	0.628624	0.745548	0.557889				0.574661	0.468083	1.22769	1			0.812725	0.825685	0.984305	0.705175			12	0.980929		1	0.705175		average	sd	#VALUE!		15	1	0.0491594
	0.756305	0.61606	1.22765	1				0.484831	0.628624	0.771258	0.577127				0.540779	0.468083	1.15531	0.941041			0.827281	0.825685	1.00193	0.717805				1		0.941041	0.717805		0.858065	0.140011	0.0404176		18	0.824707	0.0418591
	0.676391	0.61606	1.09793	0.894337				0.431776	0.628624	0.686859	0.513973				0.487935	0.468083	1.04241	0.849083			0.730944	0.825685	0.885258	0.634216				0.894337		0.849083	0.634216		normalized		0		21	0.807064	0.0591809
			#DIV/0!	#DIV/0!						#DIV/0!	#DIV/0!						#DIV/0!	#DIV/0!					#DIV/0!	#DIV/0!				#DIV/0!		#DIV/0!	#DIV/0!		0.977021	0.159421	0.0460208		24	0.590781	0.0310581
15	0.996105	0.909073	1.09574	0.892549				0.477322	0.599203	0.796596	0.596087				1	0.930397	1.07481	0.875472			1	0.71642	1.39583	1			15	0.892549		0.875472	1		average	sd	#VALUE!		3	0.590712	0.033987
	1	0.909073	1.10002	0.896039				0.49576	0.599203	0.827367	0.619113				0.987865	0.930397	1.06177	0.864849			0.953056	0.71642	1.3303	0.953056				0.896039		0.864849	0.953056		0.878246	0.0680478	0.0196437		6	0.592557	0.0550698
	0.875112	0.909073	0.962642	0.784135				0.473634	0.599203	0.79044	0.591481				0.941379	0.930397	1.0118	0.824152			0.813965	0.71642	1.13616	0.813965				0.784135		0.824152	0.813965		normalized		0
			#DIV/0!	#DIV/0!						#DIV/0!	#DIV/0!						#DIV/0!	#DIV/0!					#DIV/0!	#DIV/0!				#DIV/0!		#DIV/0!	#DIV/0!		1	0.0774815	0.022367
18	0.631187	0.657306	0.960264	0.782198				0.480777	0.753344	0.63819	0.477553				0.761218	0.814209	0.934916	0.761524			0.831771	0.799229	1.04072	0.745591			18	0.782198		0.761524	0.745591		average	sd	#VALUE!
	0.593479	0.657306	0.902897	0.735469				0.495128	0.753344	0.657239	0.491808				0.731395	0.814209	0.898288	0.731689			0.849108	0.799229	1.06241	0.761131				0.735469		0.731689	0.761131		0.729296	0.0408255	0.0117853
	0.573379	0.657306	0.872316	0.710559				0.478839	0.753344	0.635618	0.475629				0.678589	0.814209	0.833433	0.678862			0.732538	0.799229	0.916557	0.656639				0.710559		0.678862	0.656639		normalized		0
			#DIV/0!	#DIV/0!						#DIV/0!	#DIV/0!						#DIV/0!	#DIV/0!					#DIV/0!	#DIV/0!				#DIV/0!		#DIV/0!	#DIV/0!		0.8304	0.0464852	0.0134191
21	0.591471	0.850369	0.695547	0.566569				0.925809	0.751922	1.23126	0.921341				0.58663	0.86099	0.681343	0.554979			0.75286	0.806543	0.933441	0.668735			21	0.566569		0.554979	0.668735		average	sd	#VALUE!
	0.54225	0.850369	0.637665	0.51942				0.944041	0.751922	1.2555	0.939485				0.609587	0.86099	0.708006	0.576697			0.778504	0.806543	0.965236	0.691514				0.51942		0.576697	0.691514		0.568537	0.0722543	0.020858
	0.489513	0.850369	0.575648	0.468903				0.863821	0.751922	1.14882	0.859653				0.53416	0.86099	0.620402	0.505341			0.635711	0.806543	0.788192	0.564677				0.468903		0.505341	0.564677		normalized		0
			#DIV/0!	#DIV/0!						#DIV/0!	#DIV/0!						#DIV/0!	#DIV/0!					#DIV/0!	#DIV/0!				#DIV/0!		#DIV/0!	#DIV/0!		0.647355	0.0822711	0.0237496
24	0.484098	0.699666	0.691898	0.563597				0.124467	0.229318	0.542772	0.406153				0.527187	0.779659	0.676176	0.550771			0.277886	0.548884	0.506275	0.362706		***	24	0.563597		0.550771	0.362706		average	sd	#VALUE!
	0.535801	0.699666	0.765796	0.623791				0.143738	0.229318	0.626808	0.469036				0.537025	0.779659	0.688796	0.561049			0.305106	0.548884	0.555867	0.398234				0.623791		0.561049	0.398234		0.489849	0.0976358	0.028185
	0.433021	0.699666	0.618897	0.504132				0.13888	0.229318	0.605624	0.453184				0.472395	0.779659	0.6059	0.493528			0.26879	0.548884	0.489702	0.350832				0.504132		0.493528	0.350832		normalized		0
			#DIV/0!	#DIV/0!						#DIV/0!	#DIV/0!						#DIV/0!	#DIV/0!					#DIV/0!	#DIV/0!				#DIV/0!		#DIV/0!	#DIV/0!		0.557758	0.111171	0.0320924
3	0.282709	0.620962	0.455276	0.370852				0.507437	0.636269	0.79752	0.596779				0.415486	0.845248	0.491556	0.40039			0.454942	0.58446	0.778398	0.55766		***	3	0.370852		0.40039	0.55766		average	sd	#VALUE!
	0.308367	0.620962	0.496595	0.404509				0.51617	0.636269	0.811244	0.607049				0.467023	0.845248	0.552528	0.450055			0.449872	0.58446	0.769723	0.551445				0.404509		0.450055	0.551445		0.441633	0.0796995	0.0230073
	0.275249	0.620962	0.443262	0.361066				0.474308	0.636269	0.745452	0.557817				0.38026	0.845248	0.44988	0.366444			0.41792	0.58446	0.715054	0.512279				0.361066		0.366444	0.512279		normalized		0
			#DIV/0!	#DIV/0!						#DIV/0!	#DIV/0!						#DIV/0!	#DIV/0!					#DIV/0!	#DIV/0!				#DIV/0!		#DIV/0!	#DIV/0!		0.502858	0.0907485	0.0261968
6	0.18335	0.501408	0.36567	0.297862				0.770704	0.813433	0.947471	0.708986				0.36877	0.767349	0.480576	0.391447			0.414581	0.564416	0.73453	0.526232		***	6	0.297862		0.391447	0.526232		average	sd	#VALUE!
	0.239394	0.501408	0.477444	0.388909				0.8192	0.813433	1.00709	0.753599				0.350472	0.767349	0.456731	0.372024			0.412636	0.564416	0.731085	0.523764				0.388909		0.372024	0.523764		0.405426	0.0853667	0.0246433
	0.202839	0.501408	0.40454	0.329524				0.698795	0.813433	0.859069	0.642836				0.316736	0.767349	0.412766	0.336213			0.380413	0.564416	0.673995	0.482863				0.329524		0.336213	0.482863		normalized		0
																																	0.461632	0.0972013	0.0280596

## Sheet: rcv2aAD
AD rcv2a 2013 1104	Quantity	Norm Factor	Expr Level	Fold Change			AD rcv2a 2013 1210	Quantity	Norm Factor	Expr Level	Fold Change			AD rcv2a 2013 1113	Quantity	Norm Factor	Expr Level	Fold Change		ADrcv2a 2013 1218	Quantity	Norm Factor	Expr Level	Fold Change				Fold Change	Fold Change	Fold Change	Fold Change
9	0.0519749	0.0439707	1.18204	0.728205				0.960586	0.748294	1.2837	0.960586				0.714737	0.669687	1.06727	0.594971			0.506349	0.790152	0.640825	0.4591			9	0.728205	0.960586	0.594971	0.4591		average	sd	sed
	0.0573306	0.0439707	1.30384	0.803242				1	0.748294	1.33637	1				0.815153	0.669687	1.21721	0.67856			0.577675	0.790152	0.731094	0.52377				0.803242	1	0.67856	0.52377		0.696494	0.189523
	0.0481654	0.0439707	1.0954	0.67483				0.890127	0.748294	1.18954	0.890127				0.762672	0.669687	1.13885	0.634874			0.45183	0.790152	0.571827	0.409668				0.67483	0.890127	0.634874	0.409668		normalized		sed
			#DIV/0!	#DIV/0!						#DIV/0!	#DIV/0!						#DIV/0!	#DIV/0!					#DIV/0!	#DIV/0!				#DIV/0!	#DIV/0!	#DIV/0!	#DIV/0!		0.840634	0.228745	0.066033
12	0.835876	0.61606	1.35681	0.835876				0.649303	0.628624	1.0329	0.772909				0.724775	0.468083	1.54839	0.863181			0.880974	0.825685	1.06696	0.764392			12	0.835876	0.772909	0.863181	0.764392		average	sd	#VALUE!
	1	0.61606	1.62322	1				0.653292	0.628624	1.03924	0.777658				0.695509	0.468083	1.48587	0.828327			0.967124	0.825685	1.1713	0.839142				1	0.777658	0.828327	0.839142		0.828534	0.0981365	0.0283296
	0.862448	0.61606	1.39994	0.862448				0.609553	0.628624	0.969663	0.725593				0.839656	0.468083	1.79382	1			0.775509	0.825685	0.939232	0.672884				0.862448	0.725593	1	0.672884		normalized		0
			#DIV/0!	#DIV/0!						#DIV/0!	#DIV/0!						#DIV/0!	#DIV/0!					#DIV/0!	#DIV/0!				#DIV/0!	#DIV/0!	#DIV/0!	#DIV/0!		1	0.118446	0.0341924		9	0.840634	0.066033
15	0.462611	0.909073	0.508881	0.313501				0.599829	0.599203	1.00105	0.749076				0.685877	0.930397	0.737188	0.41096			0.973466	0.71642	1.35879	0.973466			15	0.313501	0.749076	0.41096	0.973466		average	sd	#VALUE!		12	1	0.0341924
	0.66283	0.909073	0.729127	0.449186				0.629005	0.599203	1.04974	0.785511				0.856733	0.930397	0.920825	0.513332			1	0.71642	1.39583	1				0.449186	0.785511	0.513332	1		0.633738	0.23967	0.0691868		15	0.764891	0.083505
	0.580324	0.909073	0.638368	0.393273				0.592925	0.599203	0.989523	0.740454				0.739604	0.930397	0.794933	0.443151			0.832947	0.71642	1.16265	0.832947				0.393273	0.740454	0.443151	0.832947		normalized		0		18	0.503086	0.0420729
			#DIV/0!	#DIV/0!						#DIV/0!	#DIV/0!						#DIV/0!	#DIV/0!					#DIV/0!	#DIV/0!				#DIV/0!	#DIV/0!	#DIV/0!	#DIV/0!		0.764891	0.28927	0.083505		21	0.563443	0.0631018
18	0.292196	0.657306	0.444536	0.273861				0.465456	0.753344	0.617853	0.462336				0.474565	0.814209	0.582853	0.324923			0.577252	0.799229	0.722261	0.517442			18	0.273861	0.462336	0.324923	0.517442		average	sd	#VALUE!		24	0.476704	0.034735
	0.364495	0.657306	0.554528	0.341623				0.520884	0.753344	0.691429	0.517392				0.489657	0.814209	0.601389	0.335256			0.703494	0.799229	0.880216	0.630604				0.341623	0.517392	0.335256	0.630604		0.416824	0.120754	0.0348588		3	0.74854	0.0505146
	0.297551	0.657306	0.452683	0.27888				0.448841	0.753344	0.595798	0.445832				0.457646	0.814209	0.562074	0.313339			0.625178	0.799229	0.782227	0.560403				0.27888	0.445832	0.313339	0.560403		normalized		0		6	0.77839	0.044562
			#DIV/0!	#DIV/0!						#DIV/0!	#DIV/0!						#DIV/0!	#DIV/0!					#DIV/0!	#DIV/0!				#DIV/0!	#DIV/0!	#DIV/0!	#DIV/0!		0.503086	0.145745	0.0420729
21	0.469026	0.850369	0.551556	0.339792				0.769206	0.751922	1.02299	0.765493				0.507627	0.86099	0.589586	0.328676			0.555228	0.806543	0.688405	0.493187			21	0.339792	0.765493	0.328676	0.493187		average	sd	#VALUE!
	0.483169	0.850369	0.568188	0.350038				0.785486	0.751922	1.04464	0.781695				0.577262	0.86099	0.670462	0.373762			0.576015	0.806543	0.714177	0.511651				0.350038	0.781695	0.373762	0.511651		0.466832	0.18111	0.052282
	0.399171	0.850369	0.46941	0.289185				0.688517	0.751922	0.915676	0.685195				0.483184	0.86099	0.561195	0.312849			0.417058	0.806543	0.517094	0.370456				0.289185	0.685195	0.312849	0.370456		normalized		0
			#DIV/0!	#DIV/0!						#DIV/0!	#DIV/0!						#DIV/0!	#DIV/0!					#DIV/0!	#DIV/0!				#DIV/0!	#DIV/0!	#DIV/0!	#DIV/0!		0.563443	0.218591	0.0631018
24	0.374158	0.699666	0.534767	0.329448				0.152202	0.229318	0.663716	0.496655				0.426918	0.779659	0.54757	0.305254			0.243351	0.548884	0.443356	0.317629			24	0.329448	0.496655	0.305254	0.317629		average	sd	#VALUE!
	0.468367	0.699666	0.669415	0.4124				0.181604	0.229318	0.79193	0.592596				0.531674	0.779659	0.681932	0.380156			0.2749	0.548884	0.500834	0.358807				0.4124	0.592596	0.380156	0.358807		0.394966	0.0996937	0.0287791
	0.38011	0.699666	0.543274	0.334689				0.170577	0.229318	0.743846	0.556615				0.488833	0.779659	0.626983	0.349524			0.234301	0.548884	0.426868	0.305817				0.334689	0.556615	0.349524	0.305817		normalized		0
			#DIV/0!	#DIV/0!						#DIV/0!	#DIV/0!						#DIV/0!	#DIV/0!					#DIV/0!	#DIV/0!				#DIV/0!	#DIV/0!	#DIV/0!	#DIV/0!		0.476704	0.120325	0.034735
3	0.399346	0.620962	0.643108	0.396193				0.681158	0.636269	1.07055	0.801086				0.761627	0.845248	0.90107	0.502319			0.583471	0.58446	0.998308	0.715208			3	0.396193	0.801086	0.502319	0.715208		average	sd	#VALUE!
	0.53513	0.620962	0.861774	0.530905				0.707234	0.636269	1.11153	0.831753				0.938667	0.845248	1.11052	0.619083			0.600731	0.58446	1.02784	0.736365				0.530905	0.831753	0.619083	0.736365		0.620191	0.144983	0.0418531
	0.463689	0.620962	0.746727	0.460028				0.640455	0.636269	1.00658	0.753216				0.752043	0.845248	0.889731	0.495998			0.489597	0.58446	0.837692	0.600139				0.460028	0.753216	0.495998	0.600139		normalized		0
			#DIV/0!	#DIV/0!						#DIV/0!	#DIV/0!						#DIV/0!	#DIV/0!					#DIV/0!	#DIV/0!				#DIV/0!	#DIV/0!	#DIV/0!	#DIV/0!		0.74854	0.174988	0.0505146
6	0.402483	0.501408	0.802706	0.494515				0.902755	0.813433	1.10981	0.830463				0.969784	0.767349	1.26381	0.704536			0.400464	0.564416	0.709518	0.508313			6	0.494515	0.830463	0.704536	0.508313		average	sd	#VALUE!
	0.561462	0.501408	1.11977	0.689846				0.886931	0.813433	1.09036	0.815906				1	0.767349	1.30319	0.726488			0.410004	0.564416	0.726421	0.520422				0.689846	0.815906	0.726488	0.520422		0.644923	0.127899	0.0369212
	0.512598	0.501408	1.02232	0.629809				0.761425	0.813433	0.936063	0.70045				0.936135	0.767349	1.21996	0.68009			0.345253	0.564416	0.611699	0.438233				0.629809	0.70045	0.68009	0.438233		normalized		0
																																	0.77839	0.154367	0.044562

## Sheet: rcv1bAD
							AD rcv1b 2013 1210	Quantity	Norm Factor	Expr Level	Fold Change			AD rcv2a 2013 1113	Quantity	Norm Factor	Expr Level	Fold Change		ADrcv1a 2013 1218	Quantity	Norm Factor	Expr Level	Fold Change				Fold Change	Fold Change	Fold Change
								0.217396	0.748294	0.290522	0.18485				0.189398	0.669687	0.282816	0.23905			0.372892	0.790152	0.471924	0.275821			9	0.18485	0.23905	0.275821			average	sd	sed
								0.200399	0.748294	0.267808	0.170398				0.171105	0.669687	0.2555	0.215961			0.387284	0.790152	0.490139	0.286467				0.170398	0.215961	0.286467			0.236737	0.0412535
								0.271752	0.748294	0.363162	0.231069				0.194848	0.669687	0.290954	0.245928			0.38002	0.790152	0.480945	0.281093				0.231069	0.245928	0.281093			normalized		sed
										#DIV/0!	#DIV/0!						#DIV/0!	#DIV/0!					#DIV/0!	#DIV/0!				#DIV/0!	#DIV/0!	#DIV/0!			0.25602	0.0446136	0.0148712
								0.249013	0.628624	0.396124	0.252042				0.0642573	0.468083	0.137278	0.116034			0.244161	0.825685	0.295707	0.172829			12	0.252042	0.116034	0.172829			average	sd	#VALUE!
								0.207345	0.628624	0.329839	0.209866				0.0925424	0.468083	0.197705	0.16711			0.20631	0.825685	0.249866	0.146037				0.209866	0.16711	0.146037			0.180533	0.0426487	0.0142162
								0.227226	0.628624	0.361465	0.229989				0.0952633	0.468083	0.203518	0.172023			0.224439	0.825685	0.271822	0.158869				0.229989	0.172023	0.158869			normalized		0
										#DIV/0!	#DIV/0!						#DIV/0!	#DIV/0!					#DIV/0!	#DIV/0!				#DIV/0!	#DIV/0!	#DIV/0!			0.195238	0.0461225	0.0153742			9	0.25602	0.0148712
								0.18487	0.599203	0.308526	0.196306				0.104311	0.930397	0.112114	0.0947642			0.188001	0.71642	0.262417	0.153372			15	0.196306	0.0947642	0.153372			average	sd	#VALUE!			12	0.195238	0.0153742
								0.226155	0.599203	0.377427	0.240145				0.125035	0.930397	0.134389	0.113592			0.0971895	0.71642	0.13566	0.0792879				0.240145	0.113592	0.0792879			0.139897	0.0648529	0.0216176			15	0.151292	0.0233784
								0.204473	0.599203	0.341242	0.217122				0.0633445	0.930397	0.0680834	0.0575473			0.131081	0.71642	0.182966	0.106936				0.217122	0.0575473	0.106936			normalized		0			18	0.115808	0.00879814
										#DIV/0!	#DIV/0!						#DIV/0!	#DIV/0!					#DIV/0!	#DIV/0!				#DIV/0!	#DIV/0!	#DIV/0!			0.151292	0.0701352	0.0233784			21	0.0979385	0.0147639
								0.155309	0.753344	0.206159	0.131173				0.0945574	0.814209	0.116134	0.098162			0.139143	0.799229	0.174097	0.101753			18	0.131173	0.098162	0.101753			average	sd	#VALUE!			24	0.475951	0.0670267
								0.165881	0.753344	0.220193	0.140102				0.0723857	0.814209	0.088903	0.0751451			0.126662	0.799229	0.15848	0.0926251				0.140102	0.0751451	0.0926251			0.107086	0.0244065	0.00813549			3	1	0.0326616
								0.167945	0.753344	0.222933	0.141845				0.0827321	0.814209	0.10161	0.0858859			0.132756	0.799229	0.166105	0.0970817				0.141845	0.0858859	0.0970817			normalized		0			6	0.649015	0.0533949
										#DIV/0!	#DIV/0!						#DIV/0!	#DIV/0!					#DIV/0!	#DIV/0!				#DIV/0!	#DIV/0!	#DIV/0!			0.115808	0.0263944	0.00879814
								0.127796	0.751922	0.169958	0.108139				0.0191417	0.86099	0.0222322	0.0187917			0.180371	0.806543	0.223635	0.130706			21	0.108139	0.0187917	0.130706			average	sd	#VALUE!
								0.116446	0.751922	0.154864	0.0985351				0.066998	0.86099	0.077815	0.065773			0.172873	0.806543	0.214338	0.125272				0.0985351	0.065773	0.125272			0.0905621	0.0409559	0.013652
								0.121989	0.751922	0.162236	0.103226				0.0373393	0.86099	0.0433678	0.0366565			0.176582	0.806543	0.218937	0.12796				0.103226	0.0366565	0.12796			normalized		0
										#DIV/0!	#DIV/0!						#DIV/0!	#DIV/0!					#DIV/0!	#DIV/0!				#DIV/0!	#DIV/0!	#DIV/0!			0.0979385	0.0442918	0.0147639
								0.192256	0.229318	0.838381	0.533436				0.277003	0.779659	0.355287	0.300306			0.319583	0.548884	0.582242	0.340297			24	0.533436	0.300306	0.340297			average	sd	#VALUE!
								0.229812	0.229318	1.00216	0.637642				0.305436	0.779659	0.391756	0.331131			0.366395	0.548884	0.667527	0.390143				0.637642	0.331131	0.390143			0.440104	0.185935	0.0619785
								0.296082	0.229318	1.29114	0.821515				0.250341	0.779659	0.321091	0.271401			0.314673	0.548884	0.573296	0.335069				0.821515	0.271401	0.335069			normalized		0
										#DIV/0!	#DIV/0!						#DIV/0!	#DIV/0!					#DIV/0!	#DIV/0!				#DIV/0!	#DIV/0!	#DIV/0!			0.475951	0.20108	0.0670267
								0.732005	0.636269	1.15046	0.732005				1	0.845248	1.18309	1			0.939477	0.58446	1.60743	0.939477			3	0.732005	1	0.939477			average	sd	#VALUE!
								0.856772	0.636269	1.34656	0.856772				0.959256	0.845248	1.13488	0.959256			1	0.58446	1.71098	1				0.856772	0.959256	1			0.924683	0.0906049	0.0302016
								1	0.636269	1.57166	1				0.865375	0.845248	1.02381	0.865375			0.969266	0.58446	1.6584	0.969266				1	0.865375	0.969266			normalized		0
										#DIV/0!	#DIV/0!						#DIV/0!	#DIV/0!					#DIV/0!	#DIV/0!				#DIV/0!	#DIV/0!	#DIV/0!			1	0.0979848	0.0326616
								0.544025	0.813433	0.668801	0.425538				0.696496	0.767349	0.907666	0.767202			0.542602	0.564416	0.961351	0.561871			6	0.425538	0.767202	0.561871			average	sd	#VALUE!
								0.57692	0.813433	0.709241	0.451268				0.7865	0.767349	1.02496	0.866343			0.575242	0.564416	1.01918	0.59567				0.451268	0.866343	0.59567			0.600133	0.14812	0.0493734
								0.711935	0.813433	0.875223	0.556877				0.625813	0.767349	0.815552	0.689343			0.470384	0.564416	0.833399	0.487088				0.556877	0.689343	0.487088			normalized		0
																																	0.649015	0.160185	0.0533949

## Sheet: rcv2b AD
AD rcv2b 2013 1104	Quantity	Norm Factor	Expr Level	Fold Change			AD rcv2b 2013 1210	Quantity	Norm Factor	Expr Level	Fold Change			AD rcv2b 2013 1113	Quantity	Norm Factor	Expr Level	Fold Change	AD rcv2b 2013 1210_2	Quantity	Norm Factor	Expr Level	Fold Change			Fold Change	Fold Change	Fold Change	Fold Change
9	0.00947217	0.0439707	0.21542	0.146237				0.79763	0.748294	1.06593	0.67007				0.823884	0.669687	1.23025	0.924958		0.944599	0.593031	1.59283	0.983353		9	0.146237	0.67007	0.924958	0.983353		average	sd	sed
	0.00882022	0.0439707	0.200593	0.136171				0.775395	0.748294	1.03622	0.651391				0.890727	0.669687	1.33006	1		0.96059	0.593031	1.6198	1			0.136171	0.651391	1	1		0.675448	0.348449
	0.00937783	0.0439707	0.213274	0.14478				0.786434	0.748294	1.05097	0.660664				0.70912	0.669687	1.05888	0.796114		0.952561	0.593031	1.60626	0.991642			0.14478	0.660664	0.796114	0.991642		normalized		sed
			#DIV/0!	#DIV/0!						#DIV/0!	#DIV/0!						#DIV/0!	#DIV/0!				#DIV/0!	#DIV/0!			#DIV/0!	#DIV/0!	#DIV/0!	#DIV/0!		0.85794	0.442593	0.127766
12	0.907513	0.61606	1.47309	1				1	0.628624	1.59078	1				0.202109	0.468083	0.43178	0.324631		1	0.636351	1.57146	0.970159		12	1	1	0.324631	0.970159		average	sd	#VALUE!
	0.884804	0.61606	1.43623	0.974977				0.99229	0.628624	1.57851	0.99229				0.211346	0.468083	0.451515	0.339469		0.983271	0.636351	1.54517	0.953929			0.974977	0.99229	0.339469	0.953929		0.787291	0.294554	0.0981848
	0.896087	0.61606	1.45454	0.987409				0.833429	0.628624	1.3258	0.833429				0.167584	0.468083	0.358022	0.269176		0.826689	0.636351	1.29911	0.802019			0.987409	0.833429	0.269176	0.802019		normalized		0
			#DIV/0!	#DIV/0!						#DIV/0!	#DIV/0!						#DIV/0!	#DIV/0!				#DIV/0!	#DIV/0!			#DIV/0!	#DIV/0!	#DIV/0!	#DIV/0!		1	0.374137	0.108004
15	1	0.909073	1.10002	0.746743				0.581552	0.599203	0.970543	0.610106				1	0.930397	1.07481	0.808089		0.666175	0.678885	0.981279	0.605804		15	0.746743	0.610106	0.808089	0.605804		average	sd	#VALUE!
	0.962301	0.909073	1.05855	0.718592				0.579597	0.599203	0.967281	0.608056				0.919901	0.930397	0.988719	0.743362		0.736891	0.678885	1.08544	0.670112			0.718592	0.608056	0.743362	0.670112		0.66821	0.08531	0.0284367
	0.980969	0.909073	1.07909	0.732532				0.473453	0.599203	0.790138	0.4967				0.793572	0.930397	0.852939	0.641276		0.700641	0.678885	1.03205	0.637147			0.732532	0.4967	0.641276	0.637147		normalized		0		9	0.85794	0.127766
			#DIV/0!	#DIV/0!						#DIV/0!	#DIV/0!						#DIV/0!	#DIV/0!				#DIV/0!	#DIV/0!			#DIV/0!	#DIV/0!	#DIV/0!	#DIV/0!		0.848746	0.108359	0.0312805		12	1	0.108004
18	0.153897	0.657306	0.234133	0.15894				0.309814	0.753344	0.411252	0.258523				0.156019	0.814209	0.19162	0.144068		0.317286	0.912236	0.347811	0.214726		18	0.15894	0.258523	0.144068	0.214726		average	sd	#VALUE!		15	0.848746	0.0312805
	0.151102	0.657306	0.22988	0.156053				0.321354	0.753344	0.42657	0.268152				0.162803	0.814209	0.199952	0.150332		0.376621	0.912236	0.412855	0.254881			0.156053	0.268152	0.150332	0.254881		0.192538	0.0512181	0.0170727		18	0.244558	0.0187801
	0.152494	0.657306	0.231998	0.15749				0.269274	0.753344	0.357438	0.224694				0.128727	0.814209	0.1581	0.118866		0.301047	0.912236	0.33001	0.203736			0.15749	0.224694	0.118866	0.203736		normalized		0		21	0.0899498	0.0100977
			#DIV/0!	#DIV/0!						#DIV/0!	#DIV/0!						#DIV/0!	#DIV/0!				#DIV/0!	#DIV/0!			#DIV/0!	#DIV/0!	#DIV/0!	#DIV/0!		0.244558	0.0650561	0.0187801		24	0.0522114	0.0125841
21	0.0545461	0.850369	0.0641441	0.0435438				0.100748	0.751922	0.133987	0.0842273				0.0685254	0.86099	0.079589	0.0598384		0.0985964	0.584248	0.168758	0.104185		21	0.0435438	0.0842273	0.0598384	0.104185		average	sd	#VALUE!		3	0.111064	0.00565587
	0.0492497	0.850369	0.0579158	0.0393158				0.0956581	0.751922	0.127218	0.0799723				0.0679062	0.86099	0.0788699	0.0592978		0.107702	0.584248	0.184343	0.113807			0.0393158	0.0799723	0.0592978	0.113807		0.0708166	0.027539	0.00917968		6	0.455802	0.0412869
	0.0463563	0.850369	0.0545132	0.037006				0.0861264	0.751922	0.114542	0.0720035				0.0546407	0.86099	0.0634626	0.0477139		0.103049	0.584248	0.176379	0.108889			0.037006	0.0720035	0.0477139	0.108889		normalized		0
			#DIV/0!	#DIV/0!						#DIV/0!	#DIV/0!						#DIV/0!	#DIV/0!				#DIV/0!	#DIV/0!			#DIV/0!	#DIV/0!	#DIV/0!	#DIV/0!		0.0899498	0.0349795	0.0100977
24	0.0680156	0.699666	0.0972116	0.0659915				0.00220973	0.229318	0.00963612	0.00605749				0.0860601	0.779659	0.110382	0.0829898		0.00392835	0.238128	0.0164968	0.0101845		24	0.0659915	0.00605749	0.0829898	0.0101845		average	sd	#VALUE!
	0.0703166	0.699666	0.1005	0.0682241				0.00301389	0.229318	0.0131429	0.00826191				0.090053	0.779659	0.115503	0.0868402		0.00403308	0.238128	0.0169366	0.010456			0.0682241	0.00826191	0.0868402	0.010456		0.0411055	0.03432	0.01144
	0.0662397	0.699666	0.0946733	0.0642685				0.00280823	0.229318	0.012246	0.00769815				0.0746374	0.779659	0.0957309	0.0719746		0.00398037	0.238128	0.0167153	0.0103194			0.0642685	0.00769815	0.0719746	0.0103194		normalized		0
			#DIV/0!	#DIV/0!						#DIV/0!	#DIV/0!						#DIV/0!	#DIV/0!				#DIV/0!	#DIV/0!			#DIV/0!	#DIV/0!	#DIV/0!	#DIV/0!		0.0522114	0.0435926	0.0125841
3	0.0666607	0.620962	0.107351	0.0728744				0.0919089	0.636269	0.14445	0.0908045				0.0942257	0.845248	0.111477	0.0838132		0.110616	0.605064	0.182817	0.112864		3	0.0728744	0.0908045	0.0838132	0.112864		average	sd	#VALUE!
	0.071023	0.620962	0.114376	0.0776433				0.0892671	0.636269	0.140298	0.0881945				0.0994443	0.845248	0.117651	0.0884551		0.10508	0.605064	0.173667	0.107216			0.0776433	0.0881945	0.0884551	0.107216		0.0874399	0.015425	0.00514166
	0.0608883	0.620962	0.0980548	0.066564				0.0788046	0.636269	0.123854	0.0778576				0.0820569	0.845248	0.0970803	0.0729891		0.107812	0.605064	0.178183	0.110004			0.066564	0.0778576	0.0729891	0.110004		normalized		0
			#DIV/0!	#DIV/0!						#DIV/0!	#DIV/0!						#DIV/0!	#DIV/0!				#DIV/0!	#DIV/0!			#DIV/0!	#DIV/0!	#DIV/0!	#DIV/0!		0.111064	0.0195925	0.00565587
6	0.209481	0.501408	0.417785	0.283611				0.35704	0.813433	0.43893	0.275922				0.569476	0.767349	0.742135	0.557969		0.41429	0.664307	0.623642	0.385013		6	0.283611	0.275922	0.557969	0.385013		average	sd	#VALUE!
	0.20832	0.501408	0.415469	0.282039				0.331779	0.813433	0.407876	0.2564				0.548175	0.767349	0.714375	0.537098		0.430633	0.664307	0.648244	0.400201			0.282039	0.2564	0.537098	0.400201		0.358849	0.1126	0.0375333
	0.19232	0.501408	0.38356	0.260377				0.292136	0.813433	0.35914	0.225764				0.458524	0.767349	0.597543	0.449259		0.422383	0.664307	0.635824	0.392533			0.260377	0.225764	0.449259	0.392533		normalized		0
																															0.455802	0.143022	0.0412869

[truncated: 15 more sheets: arr3bLD, grk7aLD, grk7aAD, grk7aDD, rgs9aLD, rgs9aDD, rgs9aAD, arr3aDD, arr3aAD, arr3aLD, grk7bLD, grk7bDD, grk7bAD, arr3bAD, arr3bDD]
