# Supplementary material for: Circadian regulation of vertebrate cone photoreceptor function
Source: eLife journal article supplement (doi:10.7554/elife.68903), 2021-09-22
Supplement: supp [file elife-68903-supp-v1.zip › elife_poa_e68903_Figure_2_source_data_1.xlsx]

## Sheet: Arrb3
															Sample Name	Target Name	Rq	p	zt5	0.0146177
															EM4145 2ret	Arr3	0.253		zt9	0.0169011
		8	12	16	20	24	4	8	12	16	20	24	4		EM4145 4ret	Arr3	0.228		zt13	0.000651018
	Arr3	0.247667	0.353	0.558333	0.790333	0.660667	0.473667	0.247667	0.353	0.558333	0.790333	0.660667	0.473667		EM4145 6ret	Arr3	0.262		zt17	0.000622018
	sd	0.0176163	0.0406325	0.135286	0.096033	0.0712905	0.0410041	0.0176163	0.0406325	0.135286	0.096033	0.0712905	0.0410041		EM4145 8ret	Arr3	0.368		zt21	0.000931498
	sem	0.0101708	0.0234592	0.0781075	0.0554447	0.0411596	0.0236737	0.0101708	0.0234592	0.0781075	0.0554447	0.0411596	0.0236737		EM4145 10ret	Arr3	0.307
	normalized	0.31337	0.446647	0.706453	1	0.835934	0.599325								EM4145 12ret	Arr3	0.384
	normalized	0.012869	0.0296826	0.0988285	0.0701535	0.0520788	0.0299541								EM4145 14ret	Arr3	0.462
		ZT1	ZT5	ZT9	ZT13	ZT17	ZT21								EM4145 16ret	Arr3	0.5
															EM4145 18ret	Arr3	0.713
															EM4145 20ret	Arr3	0.689
															EM4145 22ret	Arr3	0.802
															EM4145 24ret	Arr3	0.88
															EM4145 26ret	Arr3	0.582
															EM4145 28ret	Arr3	0.721
															EM4145 30ret	Arr3	0.679
															EM4145 32ret	Arr3	0.449
															EM4145 34ret	Arr3	0.521
															EM4145 36ret	Arr3	0.451
															EM4145 38ret	Arr3	0.288
															EM4145 40ret	Arr3	0.354
															EM4145 42ret	Arr3	0.405

## Sheet: Rgs9
	8	12	16	20	24	4	8	12	16	20	24	4								Sample Name	Target Name	Rq								ZT1	ZT5	ZT9	ZT13	ZT17	ZT21
mean	0.363333	0.432333	0.428	0.652333	0.738667	0.623333	0.363333	0.432333	0.428	0.652333	0.738667	0.623333												average	sd	sem	normalized
normalized mean	0.491877	0.585289	0.579422	0.883123	1	0.843863	0.491877	0.585289	0.579422	0.883123	1	0.843863			Sample Name	Target Name	Rq			EM4145 2ret	rgs9	0.397		0.363333	0.0335012	0.019342	0.556975	0.0296504
sd	0.0335012	0.0657951	0.0866949	0.0468224	0.0791707	0.0817455	0.0335012	0.0657951	0.0866949	0.0468224	0.0791707	0.0817455			EM4145 2ret	rgs9	0.397			EM4145 4ret	rgs9	0.33		0.432333	0.0517333	0.0298682	0.662749	0.0457868
sem	0.019342	0.0379868	0.0500533	0.0270329	0.0457092	0.0471958	0.019342	0.0379868	0.0500533	0.0270329	0.0457092	0.0471958			EM4145 8ret	rgs9	0.492			EM4145 6ret	rgs9	0.363		0.428	0.0866949	0.0500533	0.656106	0.0767296
normalized	0.026185	0.0514262	0.0677617	0.0365969	0.0618807	0.0638932	0.026185	0.0514262	0.0677617	0.0365969	0.0618807	0.0638932								EM4145 8ret	rgs9	0.492		0.652333	0.0468224	0.0270329	1	0.0414403
	ZT1	ZT5	ZT9	ZT13	ZT17	ZT21	ZT1	ZT5	ZT9	ZT13	ZT17	ZT21			EM4145 4ret	rgs9		0.33		EM4145 10ret	rgs9	0.4		0.754	0.0791707	0.0457092	1.15585	0.0700704
															EM4145 6ret	rgs9		0.363		EM4145 12ret	rgs9	0.405		0.623333	0.0817455	0.0471958	0.955544	0.0723492
																				EM4145 14ret	rgs9	0.328
								0.428							EM4145 10ret	rgs9		0.4		EM4145 16ret	rgs9	0.474
															EM4145 12ret	rgs9		0.405		EM4145 18ret	rgs9	0.482
																				EM4145 20ret	rgs9	0.646
																				EM4145 22ret	rgs9	0.609
												zt13	zt17	zt21						EM4145 24ret	rgs9	0.702
											p	0.000963462	0.00140821	0.0069948						EM4145 26ret	rgs9	0.678
																				EM4145 28ret	rgs9	0.836
																				EM4145 30ret	rgs9	0.748
																				EM4145 32ret	rgs9	0.597
																				EM4145 34ret	rgs9	0.715
																				EM4145 36ret	rgs9	0.558
																				EM4145 38ret	rgs9	0.529
																				EM4145 40ret	rgs9	0.608
																				EM4145 42ret	rgs9	0.513

## Sheet: Recvrn
Sample Name	Target Name	Rq		Sample Name	Target Name	Rq		average	8	12	16	20	24	4	8									zt13	zt17	zt21				0.686
EM4145 10ret	Actb	-		EM4145 2ret	Actb	-		rcv	0.677333	0.547667	0.520333	0.844333	1.40267	1.30433	0.840667										0.686	0.772				0.772
EM4145 10ret	opn swl	0.444		EM4145 2ret	Opn mwl	0.361																			0.772	0.574				0.574
EM4145 10ret	rcv1	0.477		EM4145 2ret	rcv1	0.686	0.686	sd	0.0992841	0.0725695	0.15043	0.0576397	0.193993	0.0966971	0.13592								p	0.0139131	0.0220062	0.000119857				0.622
EM4145 12ret	Actb	-		EM4145 2ret	rgs9	0.397		normalized																	0.622	0.477				0.477
EM4145 12ret	rcv1	0.544		EM4145 4ret	Actb	-			0.48289	0.390447	0.37096	0.601949	1	0.929895	0.599335										0.477	0.544				0.544
EM4145 14ret	Actb	-		EM4145 4ret	rcv1	0.772	0.772		0.0707824	0.0517368	0.107246	0.0410929	0.138303	0.0689381	0.0969014															0.463
EM4145 14ret	Opn mwl	0.613		EM4145 6ret	Actb	-			0.0408662	0.0298703	0.0619185	0.023725	0.0798493	0.0398014	0.055946										0.463	0.407				0.407
EM4145 14ret	rcv1	0.463		EM4145 6ret	opn swl	0.497			8	12	16	20	24	4											0.407	0.691				0.691
EM4145 14ret	rho	0.534		EM4145 6ret	rcv1	0.574	0.574		0.48289	0.390447	0.37096	0.601949	1	0.929895																0.779
EM4145 16ret	Actb	-		EM4145 8ret	Actb	-	0.622		0.0408662	0.0298703	0.0619185	0.023725	0.0798493	0.0398014											0.779	0.866				0.866
EM4145 16ret	rcv1	0.407		EM4145 8ret	rcv1	0.622	0.622		ZT1	ZT5	ZT9	ZT13	ZT17	ZT21																0.888
EM4145 16ret	rho	0.543		EM4145 8ret	rgs9	0.492																			0.888	1.306				1.306
EM4145 18ret	Actb	-		EM4145 8ret	rho	0.663																			1.306	1.626				1.626
EM4145 18ret	opn swl	0.363		EM4145 10ret	Actb	-																			1.626	0.686				0.686
EM4145 18ret	rcv1	0.691		EM4145 10ret	opn swl	0.444																			0.686	1.276				1.276
EM4145 20ret	Actb	-		EM4145 10ret	rcv1	0.477	0.477																							1.328
EM4145 20ret	rcv1	0.779		EM4145 12ret	Actb	-																			1.328	1.387				1.387
EM4145 22ret	Actb	-		EM4145 12ret	rcv1	0.544	0.544																							1.198
EM4145 22ret	rcv1	0.866		EM4145 14ret	Actb	-																								0.735
EM4145 24ret	Actb	-		EM4145 14ret	Opn mwl	0.613																								0.994
EM4145 24ret	rcv1	0.888		EM4145 14ret	rcv1	0.463	0.463																							0.793
EM4145 26ret	Actb	-		EM4145 14ret	rho	0.534	0.407
EM4145 26ret	rcv1	1.306		EM4145 16ret	Actb	-	0.691
EM4145 28ret	Actb	-		EM4145 16ret	rcv1	0.407	0.407
EM4145 28ret	rcv1	1.626		EM4145 16ret	rho	0.543
EM4145 2ret	Actb	-		EM4145 18ret	Actb	-
EM4145 2ret	Opn mwl	0.361		EM4145 18ret	opn swl	0.363
EM4145 2ret	rcv1	0.686		EM4145 18ret	rcv1	0.691	0.691
EM4145 2ret	rgs9	0.397		EM4145 20ret	Actb	-
EM4145 30ret	Actb	-		EM4145 20ret	rcv1	0.779	0.779
EM4145 30ret	rcv1	1.276		EM4145 22ret	Actb	-
EM4145 32ret	Actb	-		EM4145 22ret	rcv1	0.866	0.866
EM4145 32ret	rcv1	1.328		EM4145 24ret	Actb	-
EM4145 32ret	rho	0.824		EM4145 24ret	rcv1	0.888	0.888
EM4145 34ret	Actb	-		EM4145 26ret	Actb	-
EM4145 34ret	rcv1	1.387		EM4145 26ret	rcv1	1.306	1.306
EM4145 36ret	Actb	-		EM4145 28ret	Actb	-
EM4145 36ret	rcv1	1.198		EM4145 28ret	rcv1	1.626	1.626
EM4145 38ret	Actb	-		EM4145 2ret	Actb	-
EM4145 38ret	rcv1	0.735		EM4145 2ret	Opn mwl	0.361
EM4145 40ret	Actb	-		EM4145 2ret	rcv1	0.686	0.686
EM4145 40ret	rcv1	0.994		EM4145 2ret	rgs9	0.397
EM4145 42ret	Actb	-		EM4145 30ret	Actb	-
EM4145 42ret	rcv1	0.793		EM4145 30ret	rcv1	1.276	1.276
EM4145 4ret	Actb	-		EM4145 32ret	Actb	-
EM4145 4ret	rcv1	0.772		EM4145 32ret	rcv1	1.328	1.328
EM4145 6ret	Actb	-		EM4145 32ret	rho	0.824
EM4145 6ret	opn swl	0.497		EM4145 34ret	Actb	-
EM4145 6ret	rcv1	0.574		EM4145 34ret	rcv1	1.387	1.387
EM4145 8ret	Actb	-		EM4145 36ret	Actb	-
EM4145 8ret	rcv1	0.622		EM4145 36ret	rcv1	1.198
EM4145 8ret	rgs9	0.492		EM4145 38ret	Actb	-
EM4145 8ret	rho	0.663		EM4145 38ret	rcv1	0.735
NTC	Opn mwl	-		EM4145 40ret	Actb	-
NTC	opn swl	-		EM4145 40ret	rcv1	0.994
NTC	rcv1	-		EM4145 42ret	Actb	-
NTC	rgs9	-		EM4145 42ret	rcv1	0.793
NTC	rho	-

## Sheet: Grk1&Arrb1
EM4145 2ret	Actb	-	before	average	8	12	16	20	24	4	8	sd	8	12	16	20	24	4
EM4145 2ret	Arr1	0.963	0.699	Arr1	0.676667	0.848667	0.827	1.19967	1.05233	0.869	0.905667	Arr1	0.046694	0.142244	0.150453	0.227952	0.0633588	0.0494267
EM4145 2ret	Grk1	0.379		Grk1	0.355333	0.266	0.262	0.436667	0.485667	0.430333	0.366667	Grk1	0.0304357	0.0536936	0.0207846	0.0505206	0.0207926	0.0560119
EM4145 4ret	Actb	-
EM4145 4ret	Arr1	0.708		normalized								sem
EM4145 4ret	Grk1	0.366		Arr1	0.564046	0.707419	0.689358	1	0.877188	0.724368	0.754932	Arr1	0.0269588	0.0821246	0.0868639	0.131608	0.0365802	0.0285365
EM4145 6ret	Actb	-		Grk1	0.73164	0.547701	0.539465	0.899108	1	0.886067	0.754976	Grk1	0.0175721	0.031	0.012	0.0291681	0.0120046	0.0323385
EM4145 6ret	Arr1	0.623										normalized sem
EM4145 6ret	Grk1	0.321										Arr1	0.0224719	0.0684562	0.0724067	0.109704	0.030492	0.023787
EM4145 8ret	Actb	-										Grk1	0.0361813	0.0638298	0.0247083	0.0600578	0.0247178	0.0665858
EM4145 8ret	Arr1	1.012
EM4145 8ret	Grk1	0.328
EM4145 10ret	Actb	-
EM4145 10ret	Arr1	0.782
EM4145 10ret	Grk1	0.235
EM4145 12ret	Actb	-		normalized	8	12	16	20	24	4	8	12	16	20	24	4
EM4145 12ret	Arr1	0.752		Arr1	0.637399	0.707419	0.689358	1	0.877188	0.724368	0.637399	0.707419	0.689358	1	0.877188	0.724368
EM4145 12ret	Grk1	0.235		Grk1	0.73164	0.547701	0.539465	0.899108	1	0.886067	0.73164	0.547701	0.539465	0.899108	1	0.886067
EM4145 14ret	Actb	-
EM4145 14ret	Arr1	0.943
EM4145 14ret	Grk1	0.25
EM4145 16ret	Actb	-
EM4145 16ret	Arr1	0.657
EM4145 16ret	Grk1	0.25
EM4145 18ret	Actb	-
EM4145 18ret	Arr1	0.881
EM4145 18ret	Grk1	0.286
EM4145 20ret	Actb	-
EM4145 20ret	Arr1	0.988
EM4145 20ret	Grk1	0.425
EM4145 22ret	Actb	-
EM4145 22ret	Arr1	1.17
EM4145 22ret	Grk1	0.393
EM4145 24ret	Actb	-
EM4145 24ret	Arr1	1.441
EM4145 24ret	Grk1	0.492
EM4145 26ret	Actb	-
EM4145 26ret	Arr1	0.98
EM4145 26ret	Grk1	0.462
EM4145 28ret	Actb	-
EM4145 28ret	Arr1	1.079
EM4145 28ret	Grk1	0.501
EM4145 30ret	Actb	-
EM4145 30ret	Arr1	1.098
EM4145 30ret	Grk1	0.494
EM4145 32ret	Actb	-
EM4145 32ret	Arr1	0.88
EM4145 32ret	Grk1	0.397
EM4145 34ret	Actb	-
EM4145 34ret	Arr1	0.912
EM4145 34ret	Grk1	0.495
EM4145 36ret	Actb	-
EM4145 36ret	Arr1	0.815
EM4145 36ret	Grk1	0.399
EM4145 38ret	Actb	-
EM4145 38ret	Arr1	0.892
EM4145 38ret	Grk1	0.322
EM4145 40ret	Actb	-
EM4145 40ret	Arr1	0.985
EM4145 40ret	Grk1	0.413
EM4145 42ret	Actb	-
EM4145 42ret	Arr1	0.84
EM4145 42ret	Grk1	0.365
