# Supplementary material for: Circadian regulation of vertebrate cone photoreceptor function
Source: eLife journal article supplement (doi:10.7554/elife.68903), 2021-09-22
Supplement: supp [file elife-68903-supp-v1.zip › elife_poa_e68903_Figure_3_source_data_1.xlsx]

## Sheet: Arr3a
190219	Image Name	Channel	Name	Signal	Total	Area	Bkgnd.	Type	800/700		normalized		200219	Image Name	Channel	Name	Signal	Total	Area	Bkgnd.	Type	800/700		normalized		40319	Image Name	Channel	Name	Signal	Total	Area	Bkgnd.	Type	800/700		normalized			110319	Image Name	Channel	Name	Signal	Total	Area	Bkgnd.	Type	800/700
	0001806_02	700	1	1910	13600	594	19.7	Signal	4.50785	4.50785	0.893702			0001818_02	700	1	56800	76700	1034	19.3	Signal	1.38204	1.38204	0.679982			0001939_01	700	1	3840	12900	493	18.4	Signal	3.25521	3.25521	0.813802				0002001_01	700	1	5770	6700	528	1.75	Signal	1.76776
	0001806_02	800	2	8610	10400	594	2.97	Signal		3.78125	0.749649			0001818_02	800	2	78500	82600	1034	4.03	Signal		1.64103	0.807406			0001939_01	800	2	12500	16000	493	7	Signal		2.60194	0.650485				0002001_01	800	2	10200	11400	528	2.28	Signal
	0001806_02	700	3	3200	14900	594	19.8	Signal	3.78125	5.04403	1			0001818_02	700	3	35100	55800	1034	20	Signal	1.64103	2.03247	1			0001939_01	700	3	5150	14600	493	19.2	Signal	2.60194	4	1				0002001_01	700	3	4510	5450	528	1.79	Signal	1.20177
	0001806_02	800	4	12100	14300	594	3.77	Signal		4.11576	0.815967			0001818_02	800	4	57600	64900	1034	7.1	Signal		1.69552	0.834219			0001939_01	800	4	13400	17200	493	7.74	Signal		3.79822	0.949555				0002001_01	800	4	5420	7750	528	4.4	Signal
	0001806_02	700	5	1590	13400	594	19.8	Signal	5.04403	3.68231	0.730034			0001818_02	700	5	30800	50900	1034	19.4	Signal	2.03247	1.77249	0.872086			0001939_01	700	5	2600	11800	493	18.6	Signal	4	3.71991	0.929978				0002001_01	700	5	8310	9140	528	1.58	Signal	1.75692
	0001806_02	800	6	8020	9980	594	3.29	Signal		3.92638	0.778422			0001818_02	800	6	62600	67200	1034	4.48	Signal		1.16604	0.573705			0001939_01	800	6	10400	19300	493	18.1	Signal		3.42183	0.855457				0002001_01	800	6	14600	16000	528	2.78	Signal
	0001806_02	700	7	3110	14900	594	19.9	Signal	4.11576	3.66296	0.726198			0001818_02	700	7	33500	53600	1034	19.5	Signal	1.69552	1.16009	0.57078			0001939_01	700	7	3370	11100	493	15.6	Signal	3.79822	3.55469	0.888672				0002001_01	700	7	4340	5130	528	1.5	Signal	1.9447
	0001806_02	800	8	12800	15200	594	4.03	Signal		4.21818	0.836273			0001818_02	800	8	56800	61500	1034	4.49	Signal		0.806407	0.396762			0001939_01	800	8	12800	18000	493	10.4	Signal		3.08131	0.770328				0002001_01	800	8	8440	9550	528	2.11	Signal
	0001806_02	700	9	2770	14500	594	19.8	Signal	3.68231	4.50785	0.893702			0001818_02	700	9	37800	58000	1034	19.6	Signal	1.77249	1.38204	0.679982			0001939_01	700	9	4570	13000	493	17.1	Signal	3.71991	3.25521	0.813802				0002001_01	700	9	3820	4570	528	1.42	Signal	1.80105
	0001806_02	800	10	10200	12300	594	3.59	Signal		3.78125	0.749649			0001818_02	800	10	67000	72900	1034	5.69	Signal		1.64103	0.807406			0001939_01	800	10	17000	21900	493	9.83	Signal		2.60194	0.650485				0002001_01	800	10	6880	7890	528	1.92	Signal
	0001806_02	700	11	3260	15100	594	19.9	Signal	3.92638	5.04403	1			0001818_02	700	15	26500	49300	1034	22.1	Signal	1.16604	2.03247	1			0001939_01	700	11	3390	12300	493	18.2	Signal	3.42183	4	1				0002001_01	700	11	5490	6270	528	1.48	Signal	1.27869
	0001806_02	800	12	12800	15300	594	4.24	Signal		4.11576	0.815967			0001818_02	800	16	30900	39100	1034	7.87	Signal		1.69552	0.834219			0001939_01	800	12	11600	14000	493	4.9	Signal		3.79822	0.949555				0002001_01	800	12	7020	8150	528	2.13	Signal
	0001806_02	700	13	2700	14700	594	20.1	Signal	3.66296	3.68231	0.730034			0001818_02	700	17	43100	62900	1034	19.1	Signal	1.16009	1.77249	0.872086			0001939_01	700	13	5120	14200	493	18.4	Signal	3.55469	3.71991	0.929978				0002001_01	700	13	6560	7310	528	1.43	Signal	1.36433
	0001806_02	800	14	9890	12400	594	4.18	Signal		3.92638	0.778422			0001818_02	800	18	50000	54500	1034	4.33	Signal		1.16604	0.573705			0001939_01	800	14	18200	21700	493	7.25	Signal		3.42183	0.855457				0002001_01	800	14	8950	9790	528	1.6	Signal
	0001806_02	700	15	2750	14700	594	20.1	Signal	4.21818	3.66296	0.726198			0001818_02	700	19	71800	91200	1034	18.8	Signal	0.806407	1.16009	0.57078			0001939_01	700	15	7010	16000	493	18.3	Signal	3.08131	3.55469	0.888672				0002001_01	700	15	7970	8760	528	1.5	Signal	1.20703
	0001806_02	800	16	11600	14000	594	3.96	Signal		4.21818	0.836273			0001818_02	800	20	57900	62700	1034	4.68	Signal		0.806407	0.396762			0001939_01	800	16	21600	24500	493	5.94	Signal		3.08131	0.770328				0002001_01	800	16	9620	10500	528	1.74	Signal
[truncated: 12 more columns]

## Sheet: Grk7a
190219	Image Name	Channel	Name	Signal	Total	Area	Bkgnd.	Type	800/700	normalized			200219	grk7a	Image Name	Channel	Name	Signal	Total	Area	Bkgnd.	Type	800/700	normalized		270219	Image Name	Channel	Name	Signal	Total	Area	Bkgnd.	Type	800/700	normalized			exp_1	exp_2	exp_3		average	normalized	sd	n	sem	normalized
	0001805_02	800	1	140	1110	378	2.57	Signal	0.130841	0.872274				actin	0001826_03	800	1	3760	5970	630	3.51	Signal	0.112575	0.624997			0001900_02	800	17	2520	3780	450	2.8	Signal	0.155556	0.918157			0.872274	0.624997	0.918157		0.805143	0.930318	0.157688	3	0.0910414	0.105196	ZT1
	0001805_02	800	2	161	1130	378	2.57	Signal	0.125781	0.838542				sample4	0001826_03	800	2	2720	4930	630	3.51	Signal	0.136683	0.758844			0001900_02	800	18	1620	2930	450	2.91	Signal	0.125581	0.741237			0.838542	0.758844	0.741237		0.779541	0.900736	0.0518491	3	0.0299351	0.0345891	ZT4
	0001805_02	800	3	127	1090	378	2.55	Signal	0.0933824	0.622549				big	0001826_03	800	3	3280	5640	630	3.75	Signal	0.175401	0.973799			0001900_02	800	19	2050	3300	450	2.78	Signal	0.169421	1			0.622549	0.973799	1		0.865449	1	0.210765	3	0.121685	0.140604	ZT7
	0001805_02	800	4	375	1350	378	2.58	Signal	0.15	1					0001826_03	800	4	1710	4000	630	3.62	Signal	0.088601	0.491899			0001900_02	800	20	1040	2170	450	2.52	Signal	0.0742857	0.438467			1	0.491899	0.438467		0.643455	0.743493	0.30993	3	0.178938	0.206758	ZT10
	0001805_02	800	5	177	1140	378	2.56	Signal	0.073444	0.489627					0001826_03	800	5	2990	5330	630	3.71	Signal	0.18012	1			0001900_02	800	21	2130	3480	450	2.99	Signal	0.155474	0.917678			0.489627	1	0.917678		0.802435	0.927189	0.274009	3	0.158199	0.182794	ZT13
	0001805_02	800	6	271	1240	378	2.55	Signal	0.10037	0.669136					0001826_03	800	6	2230	4320	630	3.32	Signal	0.167669	0.930872			0001900_02	800	22	1570	2780	450	2.7	Signal	0.0882022	0.520608			0.669136	0.930872	0.520608		0.706872	0.816769	0.207719	3	0.119927	0.138571	ZT16
	0001805_02	800	7	161	1130	378	2.57	Signal	0.0547619	0.365079					0001826_03	800	7	1440	3520	630	3.29	Signal	0.0679245	0.377106			0001900_02	800	23	1280	2390	450	2.45	Signal	0.0761905	0.44971			0.365079	0.377106	0.44971		0.397298	0.459066	0.0457861	3	0.0264346	0.0305444	ZT19
	0001805_02	800	8	179	1160	378	2.59	Signal	0.061512	0.41008					0001826_03	800	8	2770	4920	630	3.41	Signal	0.0568789	0.315782			0001900_02	800	24	1220	2300	450	2.41	Signal	0.0924242	0.545528			0.41008	0.315782	0.545528		0.423797	0.489684	0.115486	3	0.0666757	0.0770417	ZT21
									0.130841	0.872274													0.112575	0.624997											0.155556	0.918157			0.872274	0.624997	0.918157		0.805143	0.930318	0.157688	3	0.0910414	0.105196
	Image Name	Channel	Name	Signal	Total	Area	Bkgnd.	Type	0.125781	0.838542					Image Name	Channel	Name	Signal	Total	Area	Bkgnd.	Type	0.136683	0.758844			Image Name	Channel	Name	Signal	Total	Area	Bkgnd.	Type	0.125581	0.741237			0.838542	0.758844	0.741237		0.779541	0.900736	0.0518491	3	0.0299351	0.0345891
	0001805_02	700	9	1070	7580	324	20.1	Signal	0.0933824	0.622549					0001826_03	700	9	33400	46300	616	20.9	Signal	0.175401	0.973799			0001900_02	700	25	16200	26200	429	23.4	Signal	0.169421	1			0.622549	0.973799	1		0.865449	1	0.210765	3	0.121685	0.140604
	0001805_02	700	10	1280	7780	324	20.1	Signal	0.15	1					0001826_03	700	10	19900	32800	616	20.9	Signal	0.088601	0.491899			0001900_02	700	26	12900	23100	429	23.7	Signal	0.0742857	0.438467			1	0.491899	0.438467		0.643455	0.743493	0.30993	3	0.178938	0.206758
	0001805_02	700	11	1360	7850	324	20	Signal	0.073444	0.489627					0001826_03	700	11	18700	31600	616	21.1	Signal	0.18012	1			0001900_02	700	28	12100	22300	510	20	Signal	0.155474	0.917678			0.489627	1	0.917678		0.802435	0.927189	0.274009	3	0.158199	0.182794
	0001805_02	700	12	2500	9040	324	20.2	Signal	0.10037	0.669136					0001826_03	700	12	19300	32400	616	21.4	Signal	0.167669	0.930872			0001900_02	700	29	14000	25300	576	19.7	Signal	0.0882022	0.520608			0.669136	0.930872	0.520608		0.706872	0.816769	0.207719	3	0.119927	0.138571
	0001805_02	700	13	2410	8950	324	20.2	Signal	0.0547619	0.365079					0001826_03	700	13	16600	29300	616	20.7	Signal	0.0679245	0.377106			0001900_02	700	30	13700	26300	640	19.7	Signal	0.0761905	0.44971			0.365079	0.377106	0.44971		0.397298	0.459066	0.0457861	3	0.0264346	0.0305444
	0001805_02	700	14	2700	9250	324	20.2	Signal	0.061512	0.41008					0001826_03	700	14	13300	26300	616	21.2	Signal	0.0568789	0.315782			0001900_02	700	31	17800	31400	693	19.7	Signal	0.0924242	0.545528			0.41008	0.315782	0.545528		0.423797	0.489684	0.115486	3	0.0666757	0.0770417
	0001805_02	700	15	2940	9470	324	20.2	Signal							0001826_03	700	15	21200	34000	616	20.8	Signal					0001900_02	700	32	16800	30200	693	19.3	Signal
	0001805_02	700	16	2910	9520	324	20.4	Signal							0001826_03	700	16	48700	61400	616	20.7	Signal					0001900_02	700	33	13200	22600	462	20.3	Signal
