# Supplementary material for: Circadian regulation of vertebrate cone photoreceptor function
Source: eLife journal article supplement (doi:10.7554/elife.68903), 2021-09-22
Supplement: supp [file elife-68903-supp-v1.zip › elife_poa_e68903_Figure_4_source_data_1.xlsx]

## Sheet: B2
am
isi	200ms	300ms	500ms	1000ms	1500ms			200	300	500	1000	1500
060416_1	0.431407	0.369877	0.877159				060416_1				0.398298	0.451399
060416_2	0	0	0.506134	0.686272	0.95246		060416_2	0	0	0.240666	0.525642	0.815939
060416_3	0	0	0.67865	0.719236	0.728386		070416_1	0	0	0.366393	0.44987	0.42401
060416_4	0	0	0.627227	0.828912	1.09697		130416_1	0	0		0.218997	0.485379
070416_1	0	0.175527	0.592169				130416_2	0	0	0.391657	0.555095	0.986652
070416_2	0	0.450488	0.703403	0.637304
070416_3	0	0	0.592418	0.844464	1.24721
070416_4	0	0.192032	0.566305
120416_1	0	0.148511	0.82972
120416_2	0	0.118219	0.464052	0.814946
120416_3	0	0.342115		0.874843	0.919377
average	0.0392188	0.163343	0.643724	0.772282	0.98888		average	0	0	0.332905	0.42958	0.632676
sd	0.130074	0.163407	0.131925	0.0905418	0.195212		sd	0	0	0.0808747	0.132964	0.253468
n	11	11	10	7	5		n	4	4	3	5	5
sem	0.0392188	0.0492692	0.0417183	0.0342216	0.0873015		sem	0	0	0.046693	0.0594632	0.113354

## Sheet: A2
am		0503_1	0503_2	0503_3	0503_4	050613_1	050613_2	050613_3	090215_1	090215_2	090215_3	090215_4	090215_5	090215_6	130813_1	130813_2	130813_3	130813_4	130813_5			average	sd	n	sem
	100	0	0	0	0	0	0	0	0.0137337	0	0	0	0	0	0	0	0	0	0			0.000762982	0.00323706	18	0.000762982
	200	0	0	0	0	0	0	0	0.0103124	0	0	0	0	0	0.0951536	0.0545462	0.0545462	0.0654817	0			0.0155578	0.0297461	18	0.00701123
	300	0	0	0	0	0.332452	0.112909	0.043868	0.0588594	0.00155581	0	0	0	0	0.190846	0.479896	0.479896	0.339659	0.193387			0.124074	0.171731	18	0.0404774
	500	0.237457	0.269302	0.121145	0.0323416		0.319885	0.268926	0.166648	0.180901	0.0614241	0.251901	0.212781	0.197514	0.472129	0.792287	0.792287	0.59443	0.501382			0.321926	0.230834	17	0.0559854
	1000	0.560149	0.564432	0.480865	0.320735		0.927151	0.799006	0.672983	0.293097	0.349492	0.485383	0.331326	0.507778	0.799715	0.745356	0.745356	0.992851	0.869147			0.614401	0.224047	17	0.0543394
	2000	0.80262	0.804858	0.734901	0.700647		0.813135	1.02139	0.745421	0.636313	0.743584	0.751526	0.731351	0.791483	0.913981	0.786129	0.786129	0.873958	0.864542			0.794233	0.0886924	17	0.0215111
	3000	0.866709	0.935938	0.826511	0.84113		0.746362	0.952063		0.896278	0.94318	0.951359	0.831241	0.868428	0.956641	0.584472	0.584472		0.902148			0.845795	0.121326	15	0.0313262
	5000	0.90837	0.936059	0.864627	1.05196					0.929665	0.961848	0.952229	0.920711	0.833466								0.928771	0.0617991	9	0.0205997
even		0503_1	090414_1	090414_2	090414_3	090414_4	090414_5	090414_6	090414_7	130813_1	130813_2	130813_3	130813_4	130813_5	130813_6		average	sd	n	sem
	100	0	0	0	0	0	0	0	0	0	0	0	0	0	0		0	0	14	0
	200	0	0	0	0	0	0	0	0	0	0	0	0	0	0		0	0	14	0
	300	0	0	0	0	0.0638379	0	0	0	0.0016692	0	0	0	0	0		0.00467908	0.0170329	14	0.00455223
	500	0.0368773	0.0679159	0.0471478	0.0610649	0.101011	0.0405679	0	0.0994917	0.28329	0.433411	0.18764	0.259105	0.233033	0.173905		0.144604	0.122762	14	0.0328095
	1000	0.283594	0.306729	0.297752	0.189113	0.276433	0.245589	0.202929	0.194888	0.799866	0.692316	0.559936	0.583656	0.777656	0.707465		0.436995	0.235314	14	0.0628904
	2000	0.633923	0.687014	0.684539	0.497509	0.564808	0.62837	0.577274	0.470668	0.827048		0.764299	0.79539	0.749206	0.91724		0.676714	0.131903	13	0.0365832
	3000	0.76626	0.829302	0.820571	0.719358	0.751246	0.787298	0.767598	0.596921	0.873654		0.902543	0.842096	0.843519	0.782766		0.79101	0.0777845	13	0.0215735
	5000	0.854987	1.01257	0.915215	0.882832	0.88521	0.870185	0.836282	0.82439								0.885209	0.0589907	8	0.0208564

## Sheet: C2
dd am	050314_1	_2	_3	_4	_5	_6	2502					3009							average	sd	n	sed
100	0	0	0	0	0	0	0	0	0	0	0	0	0	0	0	0	0		0	0	17	0
200	0	0	0	0	0	0	0	0	0	0	0	0	0	0	0	0	0		0	0	17	0
300	0	0	0	0		0	0	0	0	0	0	0	0	0	0	0	0		0	0	16	0
500	0.114977	0.0736306		0.0516333			0.00650501	0	0	0.0264329	0.0228481	0.110378	0.316111	0.165888	0.0982205	0.147301	0.198103		0.095145	0.0903211	14	0.0241393
1000	0.552963	0.226881	0.185878	0.260321	0.226127		0.380916	0.296937	0.322976	0.215094	0.287555	0.459064	0.470204	0.454975	0.449227	0.409197	0.322456		0.345048	0.110862	16	0.0277155
2000	0.761237	0.64315	0.594467	0.720429	0.470059		0.743652	0.482552	0.58704	0.510382	0.435985	0.778512	0.717418	0.469162	0.755216	0.74349	0.598413		0.625698	0.122664	16	0.0306661
3000	0.847429	0.84677	0.722761	0.808991	0.69034	0.684065		0.582291	0.587753	0.664701	0.56762	0.851345	0.882839	0.857569	0.854851	0.874973	0.782609		0.756682	0.113262	16	0.0283155
5000	0.944009	0.903037	0.733758	0.960779	0.81282	1.09616	0.872705	0.716905	0.725937	0.815209	0.741501	0.908151	0.963304	0.972651	0.925354	0.923092	0.871126		0.875676	0.105338	17	0.0255482
dd even	050314_1	050314_2	050314_3	3009_1	3009_2	3009_3	3009_4	3009_5	2502_1	2502_2	2502_3	2502_4		average	sd	n	sed
100	0	0	0	0	0	0	0	0	0	0	0	0		0	0	12	0
200	0	0	0	0	0	0	0	0	0	0	0	0		0	0	12	0
300	0	0	0	0	0	0	0	0	0	0	0	0		0	0	12	0
500	0.0566147	0	0.0228092	0	0	0	0	0	0	0.109616	0.167067	0.154965		0.0425893	0.064597	12	0.0186475
1000	0.211812	0.17079	0.166973	0.27591	0.111033	0.278249	0.255316	0.362545	0.0920233	0.163648	0.167222	0.157245		0.201064	0.0781802	12	0.0225687
2000	0.579477	0.612019		0.502909	0.29734	0.456914	0.488298	0.583374		0.36339	0.311319	0.16398		0.435902	0.147187	10	0.0465445
3000	0.732604	0.764776	0.594294	0.618705	0.369837	0.518038	0.521529	0.763212	0.597746	0.421844	0.337743	0.442448		0.556898	0.147913	12	0.0426987
5000	0.857269	0.877983	0.782994	0.729256	0.550142	0.656761	0.684929	0.756828	0.842902	0.525559	0.57009	0.706025		0.711728	0.119868	12	0.0346029
