# Supplementary material for: Circadian regulation of vertebrate cone photoreceptor function
Source: eLife journal article supplement (doi:10.7554/elife.68903), 2021-09-22
Supplement: supp [file elife-68903-supp-v1.zip › elife_poa_e68903_Figure_6_source_data_1.xlsx]

## Sheet: B
rcv1a	rcv2b	arr3a	arr3b	grk7a	grk7b	rgs9a
0.927747	0.973192	0.891714	1.0804	0.630427	1.18652	0.926028
1.01888	0.422389	0.414904	0.239448	0.0899466	0.0679954	0.107069
0.139865	0.0931933	0.0531277	0.0429334	0.0754481	0.183577	0.074751
0.0292147	0.0380901	0.0255021	0.0279041	0.0235914	0.00879191	0.0079357

## Sheet: D
normalam		131114_1	131114_2	131114_3	171114_1	171114_3	171114_4	171114_5	171114_6	241114_1	241114_2	241114_3	241114_4	241114_5	241114_6	241114_7	241114_8		average	sd	n	sem
	100	0	0	0	0	0	0	0	0	0	0	0	0	0	0	0	0		0	0	16	0
	200	0	0	0	0	0	0	0	0	0	0	0	0	0	0	0	0		0	0	16	0
	300	0.147164	0.0652437	0	0.235309	0	0	0	0	0.445444	0.0399724	0.084869	0	0.177176	0	0	0		0.0746985	0.123994	16	0.0309985
	500	0.386191	0.173077	0.201252	0.410194	0.330425	0.23379	0.252886		0.706116	0.377759	0.346426	0.0769799	0.343488	0.323177	0.204059	0.335598		0.313428	0.142935	15	0.0369057
	1000	0.746208	0.684904	0.46528	0.73817	0.992301	0.598007	0.621619		0.865191	0.638371	0.659644	0.762127	0.744441	0.70271	0.716966	0.694959		0.708727	0.119112	15	0.0307546
	2000	0.814825	0.795634	0.924954	0.948978		0.737655	0.803006	0.573964	0.726383	0.900283	1.0545	0.882931	0.894044	0.841427	0.946319	0.895587		0.849366	0.114863	15	0.0296575
	3000	0.999633	0.821498	0.853962	0.992741			0.884583	0.830645	0.956468	0.983021	0.984629	0.81996	0.98659	1.01325	0.86697	0.92763		0.92297	0.0735363	14	0.0196534
	5000	1.13828	0.931135	0.896309	1.17117			0.93607	0.84125	1.05064	1.11206	0.950811	0.965202	0.981738	0.919002	0.875413	0.935149		0.978873	0.100891	14	0.0269642
reverse		111214_1	111214_2	111214_3	111214_4	171114_1	171114_2	171114_3	131114_1	131114_2									average	sd	n	sem	p
	100	0	0	0	0	0	0		0	0									0	0	8	0
	200	0	0.225993	0	0	0	0		0	0									0.0282491	0.0799005	8	0.0282491
	300	0	0	0	0	0	0	0	0	0									0	0	9	0
	500	0.133556	0.164374	0.0718488	0.0615456	0.079672	0.207218	0.0371647	0.131073	0.199915									0.120708	0.0617331	9	0.0205777	0.00095597
	1000	0.639275	0.341914	0.597427	0.689162	0.497432	0.528289	0.405828	0.573197	0.556225									0.536528	0.109458	9	0.036486	0.0018833
	2000	0.792948	0.73525	0.773371	0.522771	0.773048	0.744387	0.682733	0.955682	0.503238									0.720381	0.139028	9	0.0463426	0.0220679
	3000	0.835649	0.730963	0.939038	0.786694	0.834741	0.696043	0.750686	0.780784										0.794325	0.0756901	8	0.0267605	0.000874793
	5000	0.834647	0.845478	0.956655	0.802905	0.848609	0.867309	0.800786	0.788802										0.843149	0.0533755	8	0.0188711	0.00220525

## Sheet: E
am		60314_1	60314_2	60314_3	60314_4	60314_5	200314_1	200314_2	200314_3	200314_4	200314_5	250214_1	250214_2	250214_3	250214_4	250214_5		average	sd	n	sem
	100	0	0	0	0	0	0	0	0	0	0	0	0	0	0	0		0	0	15	0
	200	0	0	0	0	0	0	0	0	0		0	0	0	0	0		0	0	14	0
	300	0	0	0	0	0	0	0	0	0		0	0	0	0	0		0	0	14	0
	500	0.190067	0.174942	0.202255	0.121301	0.136761	0.300413	0.0497001	0.243349	0.119166	0.202994	0.0616736	0	0.414431	0.29103	0		0.167206	0.116278	15	0.0300229
	1000	0.540245	0.466209	0.444314	0.654322	0.393552	0.767934	0.803851	0.670868	0.376037	0.54118	0.34769	0.383864	1.12434	0.772907	0.508389		0.58638	0.213892	15	0.0552266
	2000	0.824921	0.709606	0.664974	0.692654	0.729997	0.988242	0.940214	0.769339	0.724343	0.617535	0.676173	0.703333	1.10186	0.972137	0.703672		0.787933	0.144178	15	0.0372266
	3000	0.87569	0.927163	0.704269	0.767855	0.843816	0.845978	0.967925	0.880659	0.767869	0.76583	0.774219	0.775795	0.985155	0.917942	0.807471		0.840509	0.0836319	15	0.0215937
	5000	0.809095	0.916116	0.757078	0.749287	0.805764	0.921488	1.15156	0.857093	0.868327	0.872073	0.768509	0.877957	0.979476	0.912276	0.785264		0.868758	0.103745	15	0.0267868
even		60314_1	60314_2	60314_3	60314_4	60314_5	250214_1	250214_2	250214_3	250214_4	250214_5	260214_1						average	sd	n	sem
	100	0	0	0	0	0	0	0	0	0	0	0	0					0	0	12	0
	200	0	0	0	0	0	0	0	0	0	0	0	0					0	0	12	0
	300	0	0	0	0	0	0	0	0	0	0	0.0786208	0					0.00655174	0.0226959	12	0.00655174
	500	0.108432	0.0768512	0	0.108146	0.16801	0	0	0.0596345	0	0	0.128117	0.12194					0.0642609	0.06243	12	0.018022
	1000	0.622031	0.545323	0.120563	0.534809	0.608572	0.528294	0.629538	0.635111	0.527507	0.65932	0.0874107	0.363227					0.488475	0.196153	12	0.0566245
	2000	0.749822	0.772126	0.43417	0.795877	0.898505	0.991533	0.733644	0.974977	0.868926	0.999277	0.538696	0.712934					0.789207	0.175156	12	0.0505632
	3000	0.820545	0.842547	0.589875	0.848162	0.805343	0.833689	0.792229	0.934215	0.855452	1.03831	0.551198	0.638255					0.795818	0.14002	12	0.0404202
	5000	0.915813	0.919798	0.796085	0.882599	0.931273	0.873963	0.767848	0.927377	0.831125	0.952306	0.983216	0.85106					0.886039	0.0647184	12	0.0186826
