# Supplementary material for: Circadian regulation of vertebrate cone photoreceptor function
Source: eLife journal article supplement (doi:10.7554/elife.68903), 2021-09-22
Supplement: supp [file elife-68903-supp-v1.zip › elife_poa_e68903_Supplementary_file_1.txt]

           pVal            phase   peak.shape  period       independent repeat
arr3aLD 2.558226e-17        6          15        24              7
arr3aDD 8.49401e-05         3          15        24              3
arr3aAD 6.260499e-08        6          6         24              3
arr3bLD 8.164126e-11        6          9         24              7
arr3bDD 7.731476e-09        3          12        24              4
arr3bAD 4.893735e-08        6          9         24              3
grk7aLD 4.856216e-22        3          12        24              7
grk7aDD 3.132741e-07        3          9         24              3
grk7aAD 1.884317e-15        3          12        24              3
grk7bLD 1.467603e-18        3          12        24              5
grk7bDD 2.665216e-05        3          12        24              3
grk7bAD 6.224646e-11        3          12        24              3
rgs9aLD 9.465091e-16        24         15        24              7
rgs9aDD 6.847552e-09        24         15        24              4
rgs9aAD 2.569052e-08        24         15        24              3
rcv2bLD 3.537504e-17        6          12        24              6
rcv2bDD 4.189147e-06        6          12        24              3
rcv2bAD 3.476102e-12        6          12        24              4
rcv1bAD 1.345748e-09        21         18        24              3
rcv1aLD 0.004128751         21         9         24              5
rcv1aDD 0.0001653091        9          15        24              4
rcv1aAD 1.359048e-08        6          18        24              3
rcv2aLD 0.04567419          12         6         24              8
rcv2aDD 0.2788971           24         12        24              5
rcv2aAD 5.914979e-05        6          6         24              4
