# Supplementary material for: Circadian regulation of vertebrate cone photoreceptor function
Source: eLife journal article supplement (doi:10.7554/elife.68903), 2021-09-22
Supplement: supp [file elife-68903-supp-v1.zip › elife_poa_e68903_Supplementary_file_2.txt]

         pVal        phase  peak.shape period     independent repeat
grk1 3.893268e-06    20         12     24              3
arr1 4.139664e-05    16         12     24              3
arr3 1.498089e-08    16         12     24              3
rcv1 1.57819e-05     20         16     24              3
rgs9 1.728493e-05    20          8     24              3
