# Supplementary material for: Circadian regulation of vertebrate cone photoreceptor function
Source: eLife journal article supplement (doi:10.7554/elife.68903), 2021-09-22
Supplement: supp [file elife-68903-supp-v1.zip › elife_poa_e68903_Supplementary_file_3.txt]

           pVal     phase    peak.shape   period  independent measures
Arr3a 0.0002942898     9         15         24             4
Grk7a 0.01488935       9         12         24             3
