# Supplementary material for: Circadian regulation of vertebrate cone photoreceptor function
Source: eLife journal article supplement (doi:10.7554/elife.68903), 2021-09-22
Supplement: supp [file elife-68903-supp-v1.zip › elife_poa_e68903_Supplementary_file_4.txt]

Gene name	Parameter	Morning(default value)	Evening
arr3a	Total molecules	32195097.04	13561245.57 (default/2.374052)
grk7a	Total molecules	14811.03166	1297.637744 (default/11.41384)
rgs9a	Total molecules	2553626.149	338366.0756 (default/7.546933)
rcv2b	Total molecules	13047242.08	1367923.783 (default/9.5397989)
