# Supplementary figures and images for: Circadian regulation of vertebrate cone photoreceptor function
Source: eLife journal article supplement (doi:10.7554/elife.68903), 2021-09-22

Figure 1- figure supplement 1

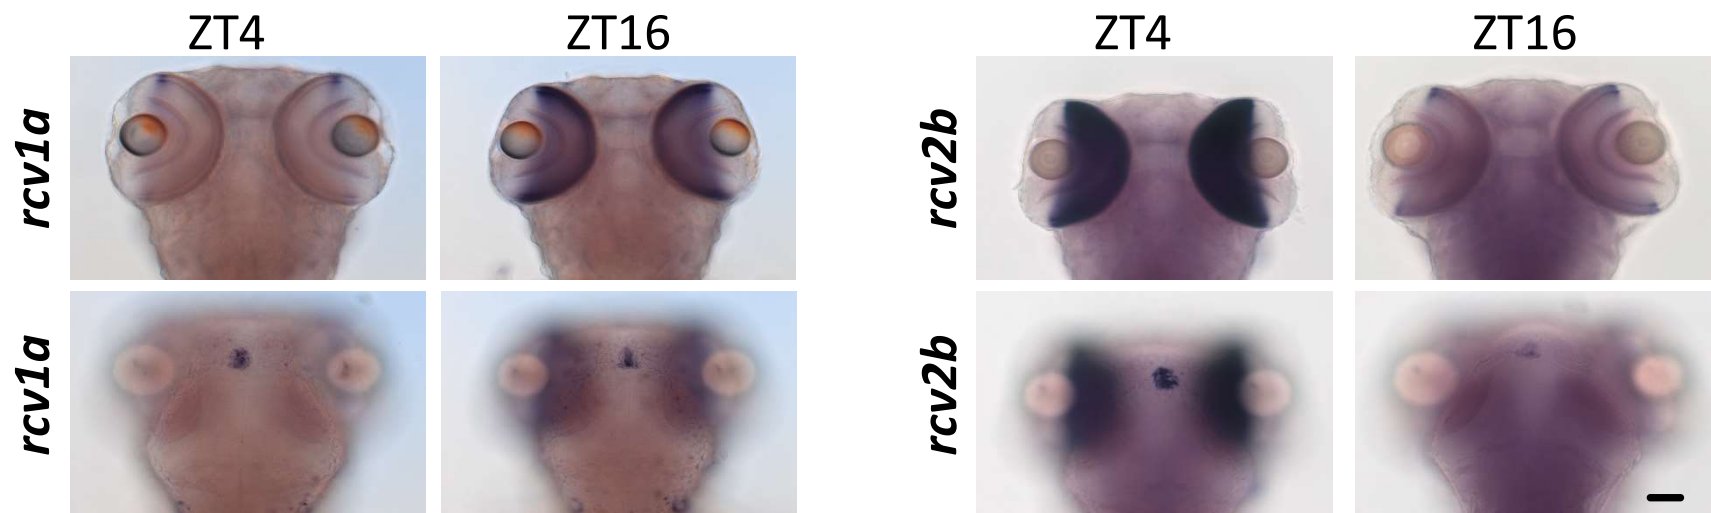

Supplement: supp [file elife-68903-supp-v1.zip]

Figure 1- figure supplement 2

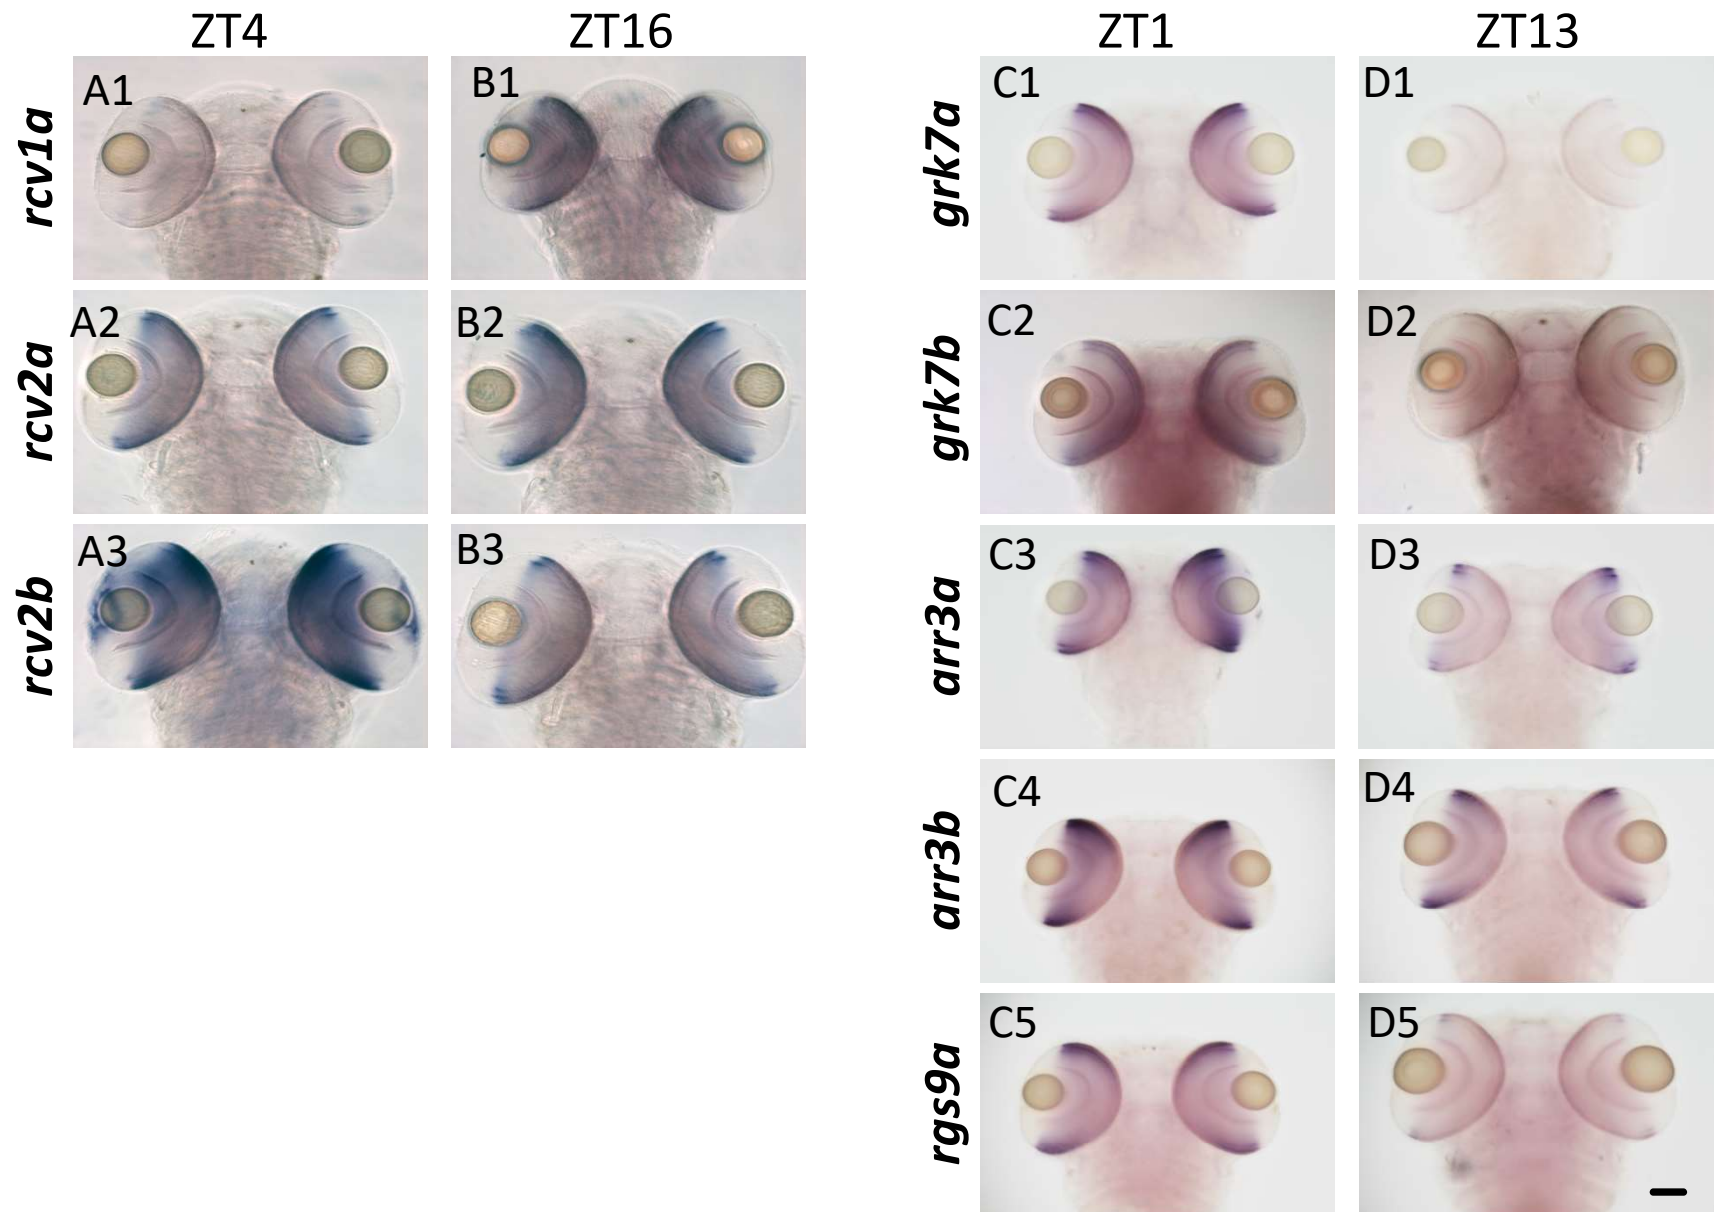

Supplement: supp [file elife-68903-supp-v1.zip]

Figure 1- figure supplement 4

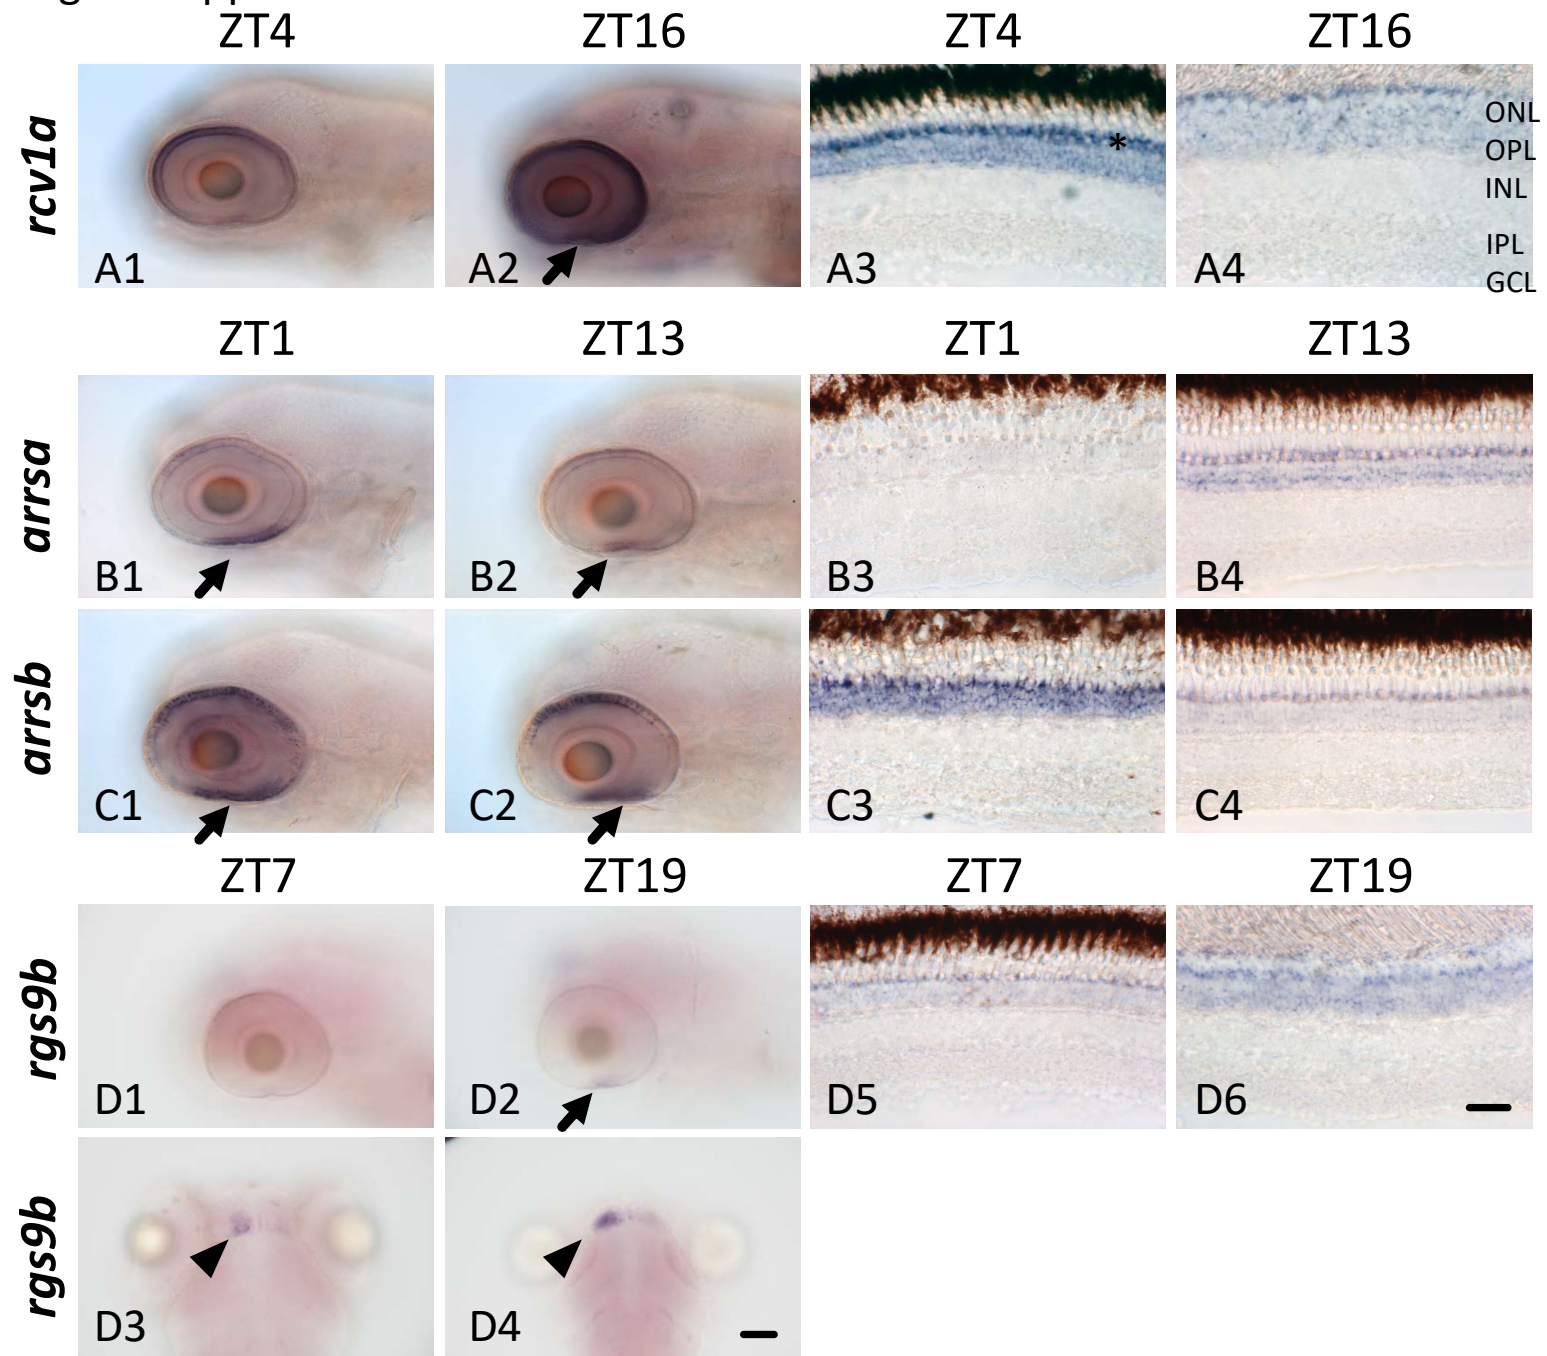

Supplement: supp [file elife-68903-supp-v1.zip]

Figure 7- figure supplement 1

A

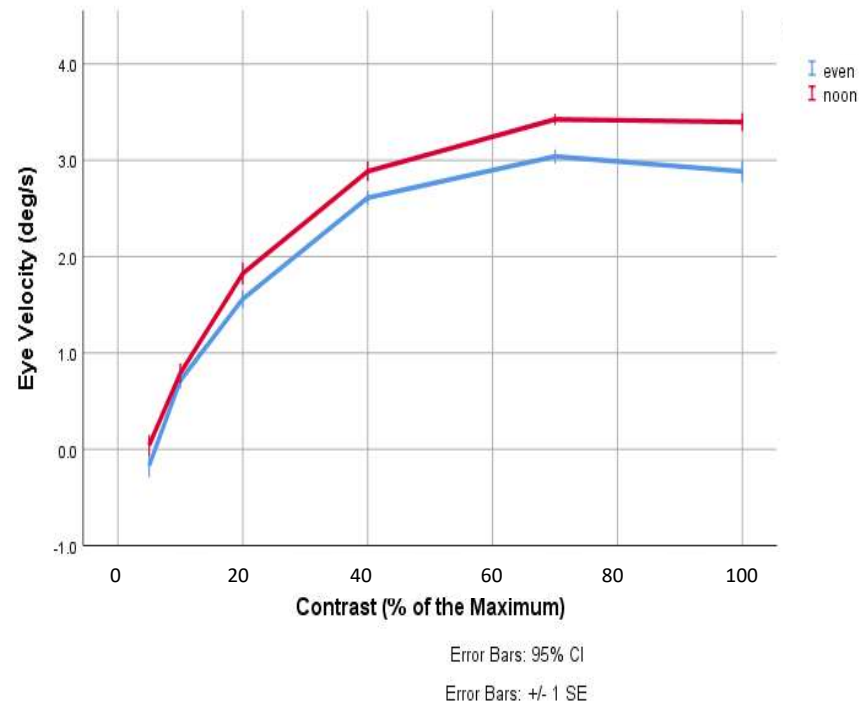

B

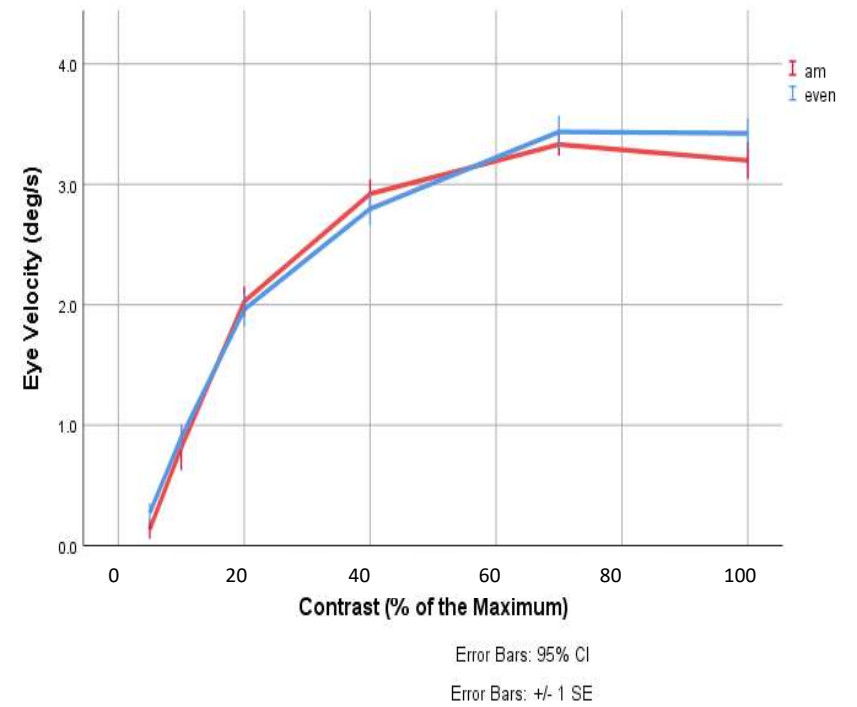

Supplement: supp [file elife-68903-supp-v1.zip]

Figure 1- figure supplement 3

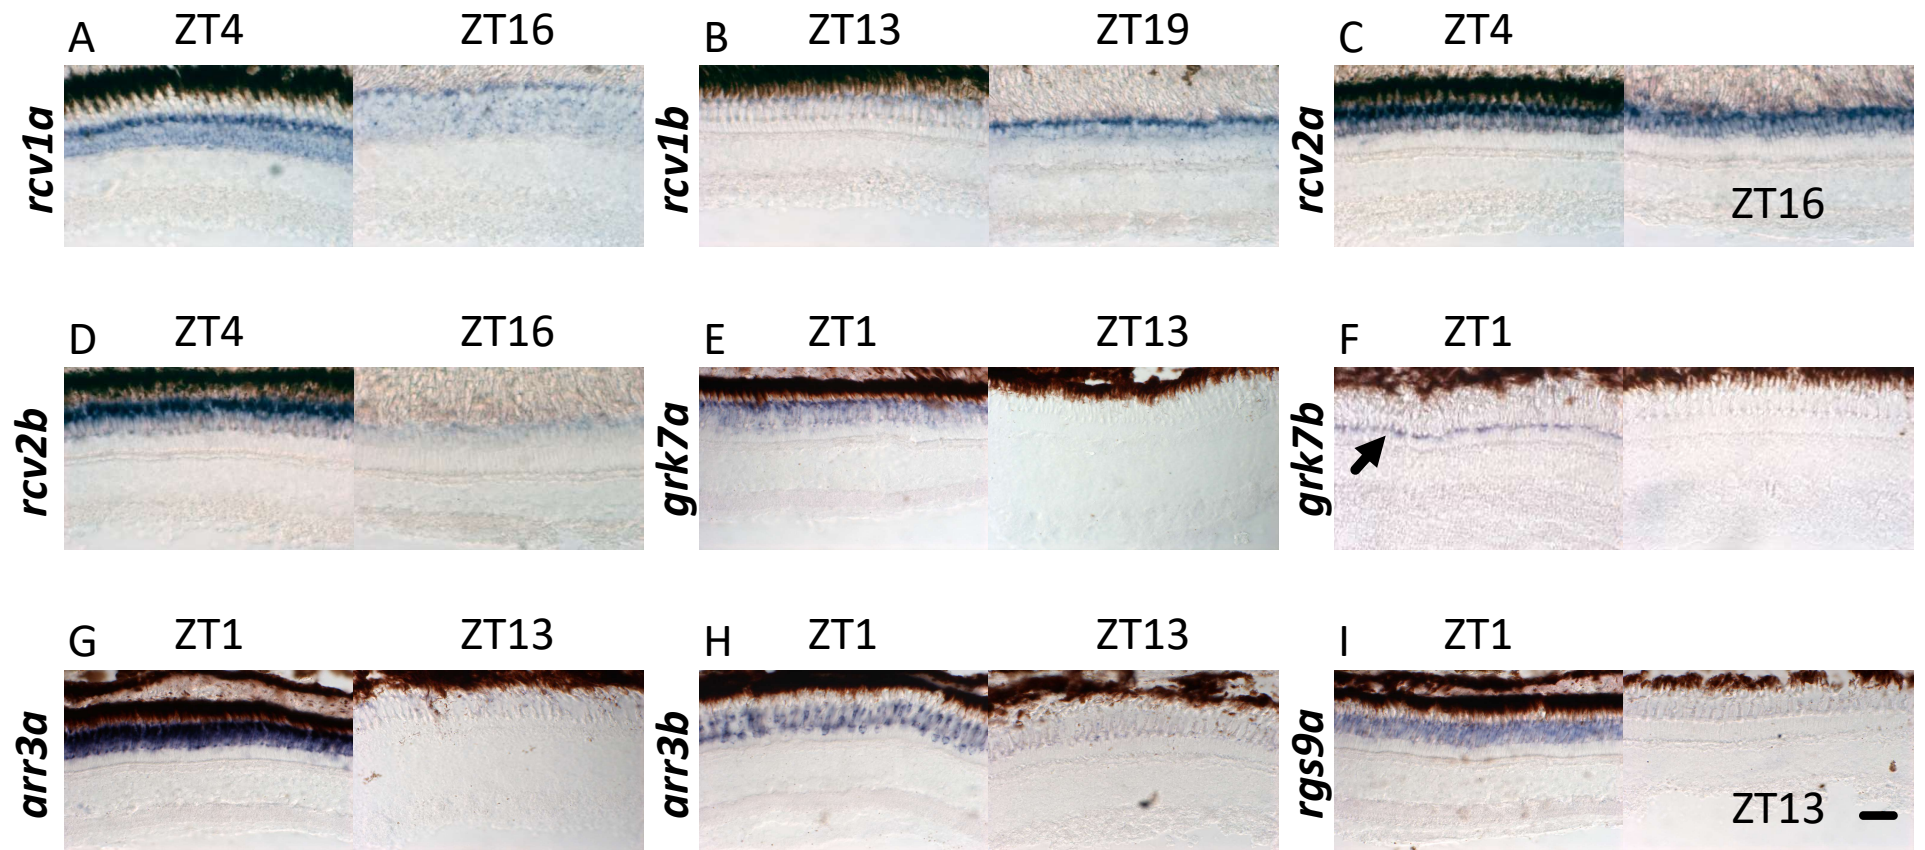

Supplement: supp [file elife-68903-supp-v1.zip › elife_poa_e68903_Figure_1_figure_supplement_3.pdf]

Figure 4- figure supplement 1

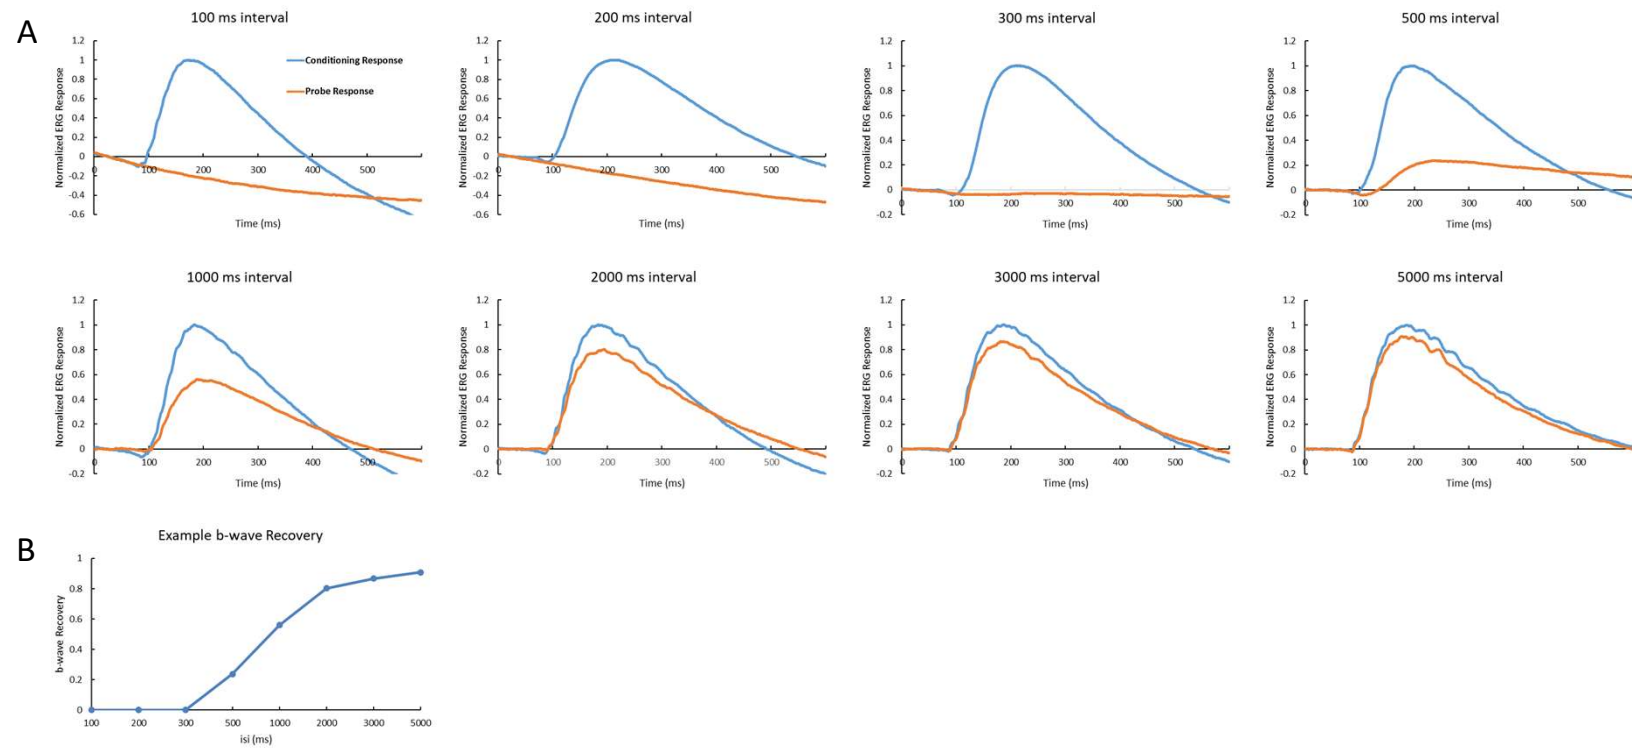

Supplement: supp [file elife-68903-supp-v1.zip › elife_poa_e68903_Figure_4_figure_supplement_1.pdf]

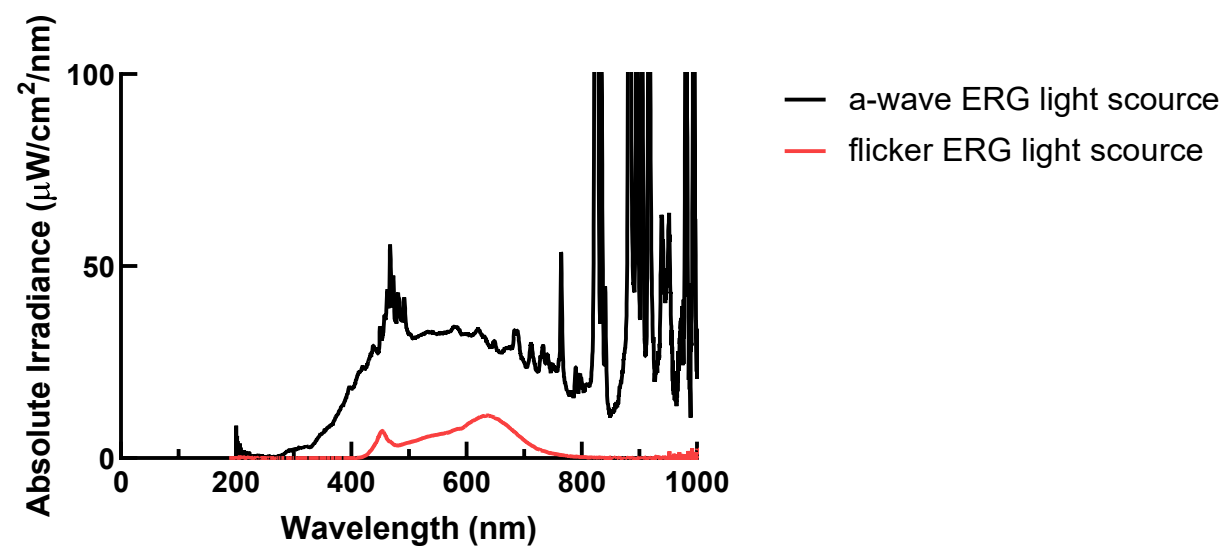

Supplement: supp [file elife-68903-supp-v1.zip › elife_poa_e68903_Figure_4_figure_supplement_2.pdf]

Figure 7- figure supplement 2

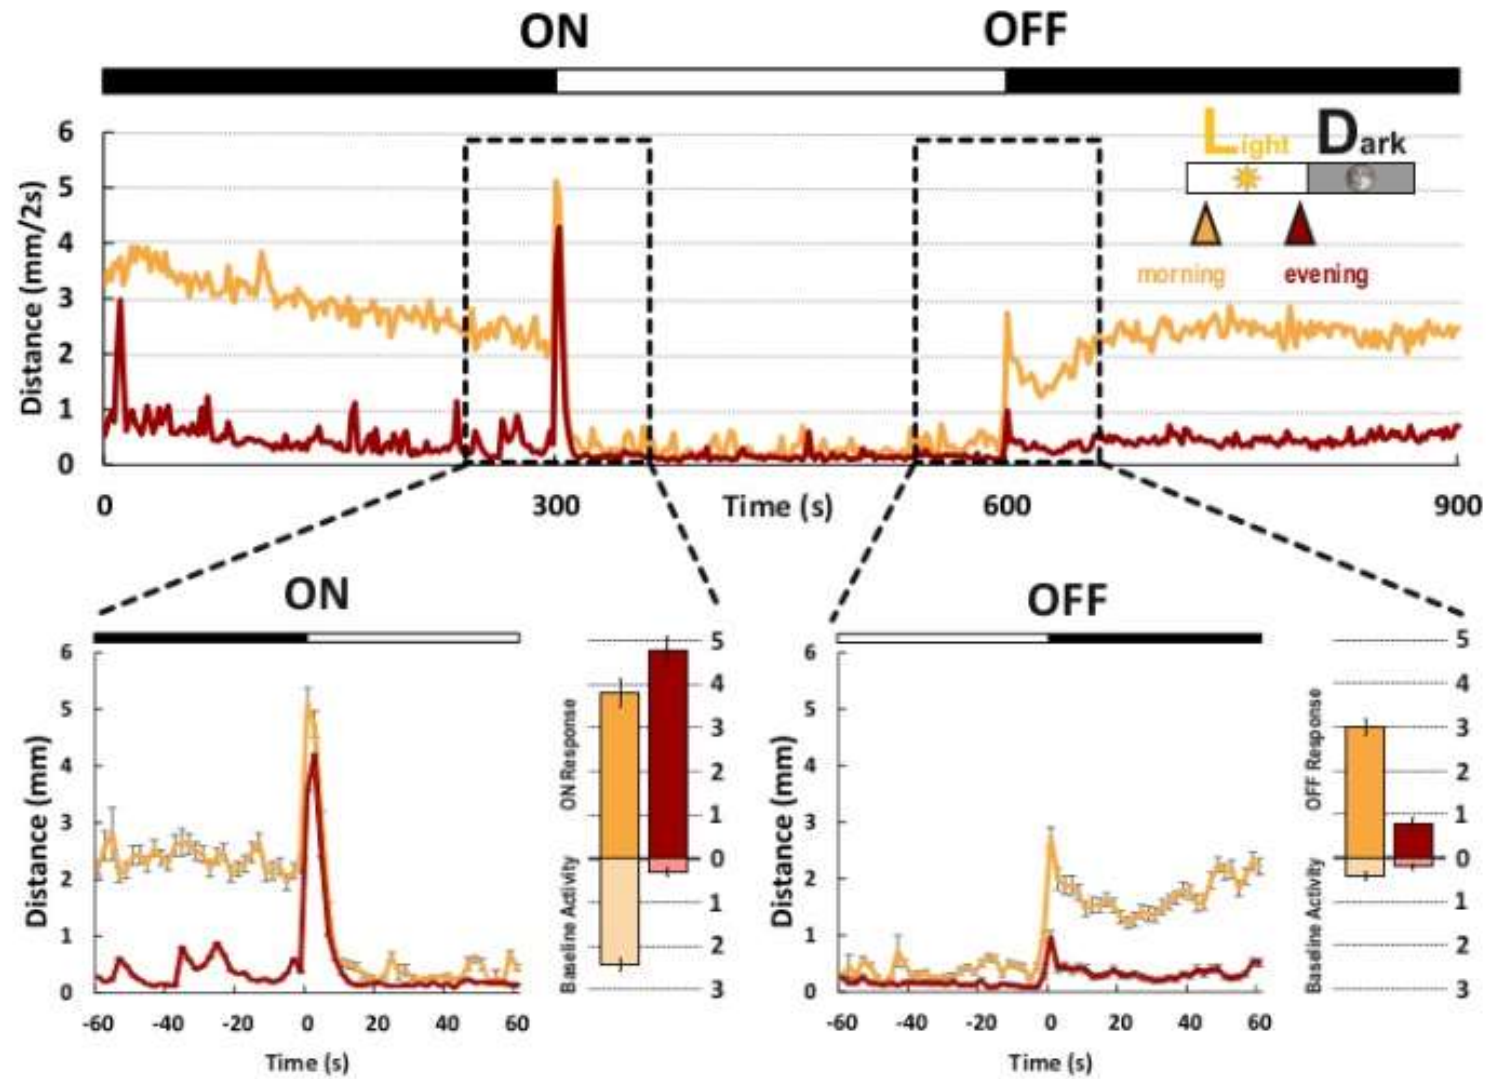

Supplement: supp [file elife-68903-supp-v1.zip › elife_poa_e68903_Figure_7_figure_supplement_2.pdf]
